# Supplementary material
Source: PubMed Central journal article supplement (PMC3515204)
Supplement: NIHMS412622-supplement-1.pdf [file NIHMS412622-supplement-1.pdf]

## Supplementary Information

### Exome sequencing of serous endometrial tumors identifies recurrent somatic mutations in chromatin-remodeling and ubiquitin ligase complex genes

Matthieu Le Gallo<sup>1\*</sup>, Andrea J. O'Hara<sup>1\*</sup>, Meghan L. Rudd<sup>1</sup>, Mary Ellen Urick<sup>1</sup>, Nancy F. Hansen<sup>2</sup>, Nigel J. O'Neil<sup>3</sup>, Jessica C. Price<sup>1</sup>, Suiyuan Zhang<sup>2</sup>, Bryant M. England<sup>1</sup>, Andrew K. Godwin<sup>4</sup>, Dennis C. Sgroi<sup>5</sup>, NISC Comparative Sequencing Program<sup>6</sup>, Philip Hieter<sup>3</sup>, James C. Mullikin<sup>2,6</sup>, Maria J. Merino<sup>7</sup>, and Daphne W. Bell<sup>1</sup>

\*Denotes equal contribution

<sup>1</sup> Cancer Genetics Branch, National Human Genome Research Institute, National Institutes of Health, Bethesda, MD 20892, USA

<sup>2</sup> Genome Technology Branch, National Human Genome Research Institute, National Institutes of Health, Bethesda, MD 20892, USA

<sup>3</sup> Michael Smith Laboratories, University of British Columbia, Vancouver, BC, V6T 1Z4, Canada

<sup>4</sup> Department of Pathology and Laboratory Medicine, University of Kansas Medical Center, Kansas City, KS 66106, USA

<sup>5</sup> Molecular Pathology Unit and Center for Cancer Research, Massachusetts General Hospital, 149 13th Street, Charlestown, MA 02129, USA

<sup>6</sup> NIH Intramural Sequencing Center (NISC), National Institutes of Health, Bethesda, MD 20892, USA

<sup>7</sup> National Cancer Institute, National Institutes of Health, Bethesda, MD 20892, USA

**Correspondence to:** Dr. Daphne W. Bell, National Human Genome Research Institute, Cancer Genetics Branch, 50 South Drive, MSC-8000, Bethesda, MD 20892; Phone (301) 594-9256; Fax (301) 594-1360; Email [belldaph@mail.nih.gov](mailto:belldaph@mail.nih.gov)

## **Supplementary Note**

### **NIH Intramural Sequencing Center (NISC)**

Contributions from NISC were made by Betty Benjamin, Robert Blakesley, Gerry Bouffard, Shelise Brooks, Holly Coleman, Mila Dekhtyar, Michael Gregory, Xiaobin Guan, Jyoti Gupta, Joel Han, April Hargrove, Shi-ling Ho, Taccara Johnson, Richelle Legaspi, Sean Lovett, Quino Maduro, Cathy Masiello, Baishali Maskeri, Jenny McDowell, Casandra Montemayor, James Mullikin, Betsy Novotny, Morgan Park, Nancy Riebow, Karen Schandler, Brian Schmidt, Christina Sison, Mal Stantripop, James Thomas, Meg Vemulapalli, and Alice Young.

### **Clinical data**

A determination was made by the NIH Office for Human Subjects Research Protections (OHSRP) that this research was not "human subjects research" per the Common Rule (45 CFR 46).

### **Genotype and variant calling**

The MPG ("Most Probable Genotype") genotype caller takes as its input a set of sequence reads aligned to an orthologous reference sequence. These sequence reads are assumed to be (1) correctly aligned to the reference, and (2) derived from one or two copies of a modified reference sequence, as would be the case in re-sequencing reads from non-repetitive regions of a diploid individual. In addition, if base quality estimates are provided, these are assumed to be accurate reflections of the probability that the read sequence actually represents the sample. The MPG algorithm is implemented in a perl

script called “bam2mpg”, which reads BAM formatted files, and outputs predicted genotypes and scores at all regions of the genome covered by at least one read.

Any variation between a set of aligned sequence reads and the reference sequence can be specified by its flanking reference coordinates and a list of all of the observed sequences between them (which we will refer to as “alleles”). For example, a single nucleotide variant (SNV) can be specified by giving the coordinates to the left and right of the changed base, and all possible bases at that location (e.g., hg18 chr1:16,901,843-16,901,845, T/C). A deletion-insertion variant (DIV) can also be specified by giving the coordinates of the outer boundaries of the feature, with a list of all possible sequences seen between those two boundaries (e.g., hg18 chr1:145,232,693-145,232,694, -/AT represents an insertion of the sequence “AT” between the two coordinates listed). For variants predicted by MPG, the reference sequence is always included in the list of possible alleles.

As a simplification, we can assume that the read bases seen in a resequencing experiment are independently sequenced with equal probability from each of two chromosomes (in the case of autosomes, or one in cases where only one chromosome is present), and are then chosen from a random distribution in which sequencing errors occur with a total probability  $e_k$ . Given a group of aligned sequence reads at a variant site, we can calculate the posterior probability of all possible genotypes at that position using Bayes theorem. For a simple variant with only two possible alleles (the reference and a variant sequence), the genotypes considered are homozygous reference, heterozygous, and homozygous

non-reference. If we denote the posterior probability of one of M possible genotypes  $G_i$ , given N observed read sequences  $A_1, \dots, A_N$  as  $P(G_i | A_1, \dots, A_N)$ , the likelihood of observing  $A_1, \dots, A_N$  as  $P(A_1, \dots, A_N | G_i)$ , and the prior probability of a site having the genotype  $G_i$  as  $P(G_i)$ , then the desired posterior probabilities of the different genotypes can be calculated using the equation

$$P(G_i | A_1, \dots, A_N) = \frac{P(A_1, \dots, A_N | G_i) P(G_i)}{\sum_{j=1}^M P(A_1, \dots, A_N | G_j) P(G_j)}$$

where

$$P(A_1, \dots, A_N | G_j) = \prod_{k=1}^N P(A_k | G_j)$$

and

$$P(A_k | G_j) = (1 - e_k) \left( \frac{1}{2} (\delta_{G_{j,1}, A_k} + \delta_{G_{j,2}, A_k}) \right) + e_k \left( \frac{1}{2} ((1 - \delta_{G_{j,1}, A_k}) + (1 - \delta_{G_{j,2}, A_k})) \right).$$

The calculation is simplified by noting that for any two possible genotypes,

$$\log \left( \frac{P(G_i | A_1, \dots, A_N)}{P(G_j | A_1, \dots, A_N)} \right) = \sum_{k=1}^N \left\{ \log(P(A_k | G_i)) - \log(P(A_k | G_j)) \right\} + \log \left( \frac{P(G_i)}{P(G_j)} \right).$$

The last term in this last equation is the log of the ratio of the prior probabilities, and is assumed by MPG to be the same for all non-reference genotypes compared to the reference (and 0 for all other combinations of genotypes). This value can be passed as a parameter to bam2mpg, and its default value is 3, corresponding to a reference genotype that is expected to be 1000 times more probable than any non-reference genotype.

Once the most probable genotype is determined, it is reported by bam2mpg, along with its “MPG score”, which is the value of  $\log(P(G_i | A) / P(G_j | A))$  when  $G_i$  is the most probable genotype and  $G_j$  is the second most probable genotype. We have found empirically that when calculated from well-aligned Illumina reads, genotypes with MPG scores of 10 or

greater agree with Infinium genotypes about 99.8% of the time.

The “MPV”, or “Most Probable Variant”, score is an alternative scoring method which scores a site’s genotype call as the log ratio of posterior probabilities of the most probable genotype compared to the homozygous reference genotype (as opposed to the second most probable genotype, as above). This assesses the probability that any variant is present, and is more suitable when variant detection, rather than exact genotype prediction, is the goal.

**Supplementary Figure 1**  
**Number of somatic variants called by exome sequencing of 13 serous endometrial tumors in a mutation discovery screen**

**Supplementary Figure 2**  
**Distribution of 1,544 exonic and splice junction somatic mutations identified by exome sequencing of 13 primary serous endometrial tumors**

**Supplementary Figure 3**  
**Sequence chromatograms showing somatic mutations in *CHD4*, identified in primary endometrial cancers**

**Supplementary Figure 4**  
**Somatic mutations in *MAP3K4*, *ABCC9*, and *CYP4X1* in serous endometrial cancers**

**Supplementary Figure 5**  
**Distribution of somatic mutations in *CHD4*, *FBXW7*, and *SPOP* relative to the microsatellite instability and *MSH6* mutation status**

**Supplementary Figure 6**  
***CHD4* expression in endometrial cancer cell lines**

**Supplementary Figure 7**  
**Cross-species conservation of *CHD4***

**Supplementary Figure 8**  
**Alignment of *CHD4* and closely related family members**

**Supplementary Figure 9**  
**Partial, structure-based, sequence alignment of the ATPase/helicase and helicase domains of *CHD4* to the Snf2 domains of *SMARCA2*, *SMARCAL1*, and *SMARCA4***

**Supplementary Figure 10**  
**Distribution of somatic variants called by whole exome sequencing according to score and coverage**

**Supplementary Table 2**  
**Depth of whole exome sequencing coverage**

**Supplementary Table 3**  
**Exonic somatic mutation rate of the 13 serous endometrial tumors included in the exome discovery screen**

**Supplementary Table 6**  
**Distribution of somatic variants called by whole exome sequencing among 12 tumors in the discovery screen**

**Supplementary Table 7**

**Nine genes with validated mutations in more than one tumor in the discovery screen**

**Supplementary Table 8**

**Frequency of *TP53*, *PIK3CA*, and *PPP2R1A* among serous endometrial tumors**

**Supplementary Table 9**

**Overall frequency of somatic mutations in combined discovery and prevalence screens of *CHD4*, *SPOP*, *FBXW7*, *ABCC9*, *CYP4X1*, *MAP3K4*, *TP53*, *PIK3CA* and *PPP2R1A***

**Supplementary Table 10**

**Mutation rate of individual genes in 52 serous tumors, compared to the background mutation rate for serous endometrial cancers**

**Supplementary Table 12**

**MSI status and *MSH6* status of tumors with *CHD4*, *FBXW7*, and *SPOP* mutations**

**Supplementary Table 14**

**Networks identified by Ingenuity Pathway Analysis**

**Supplementary Table 15**

**Estimated power to detect somatically mutated genes in a discovery screen of 12 tumors**

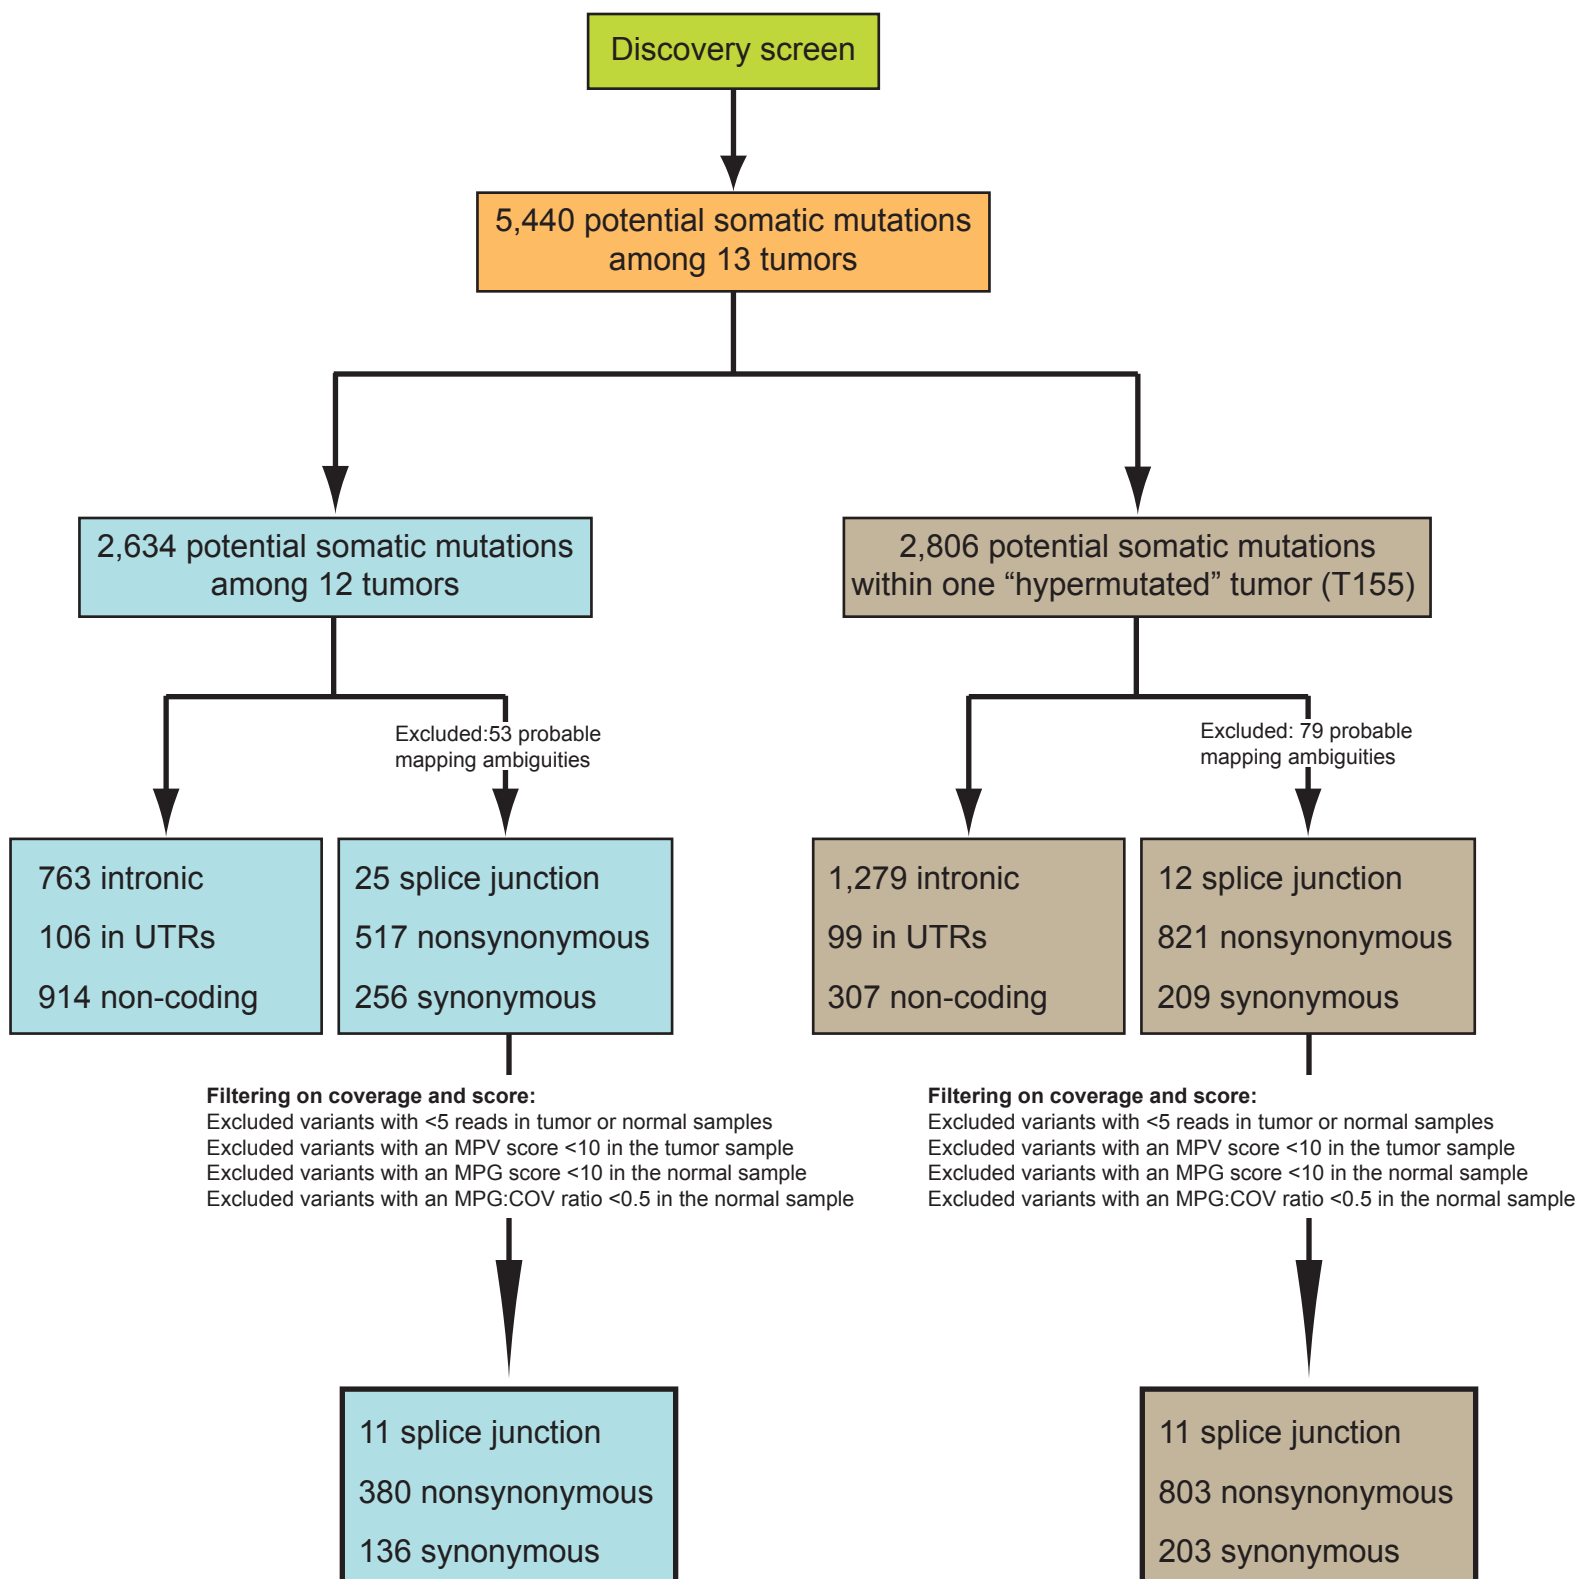

**Supplementary Figure 1. Number of somatic variants called by exome sequencing of 13 serous endometrial tumors in a mutation discovery screen.** After filtering on coverage and score, there were 1,522 exonic (nonsynonymous and synonymous) somatic variants and 22 somatic splice junction variants among 13 tumors. One tumor (T155) appeared to be hypermutated.



**a**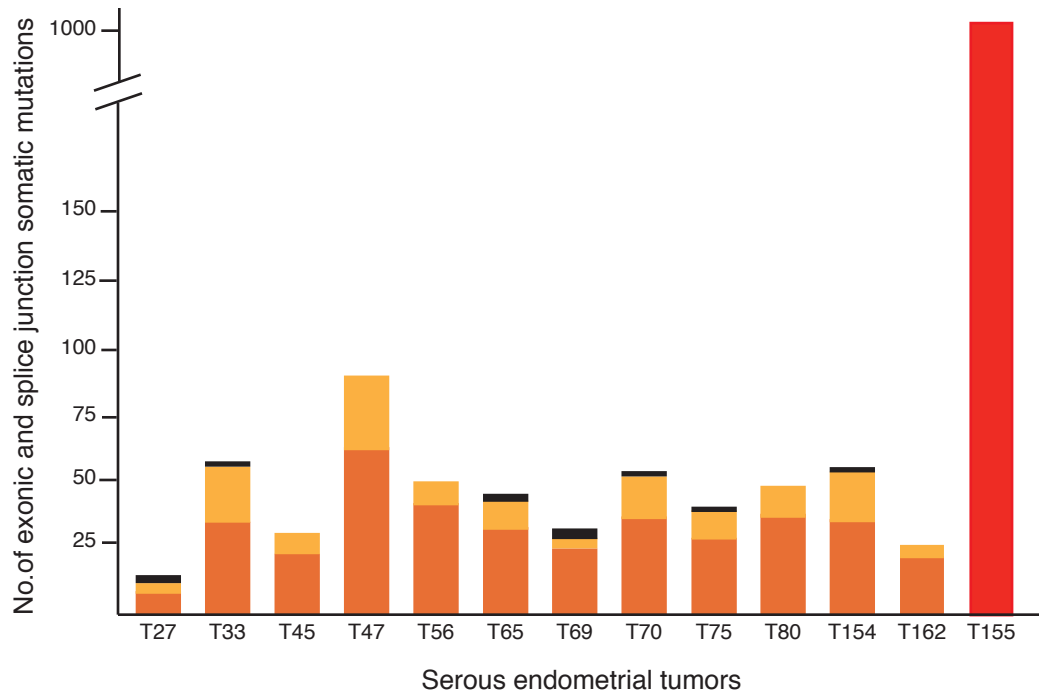**b**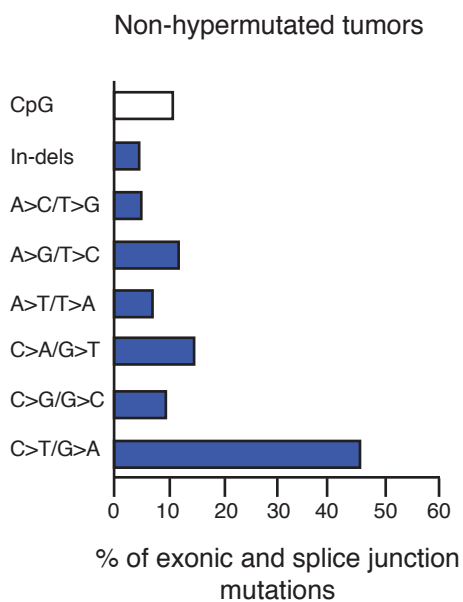**c**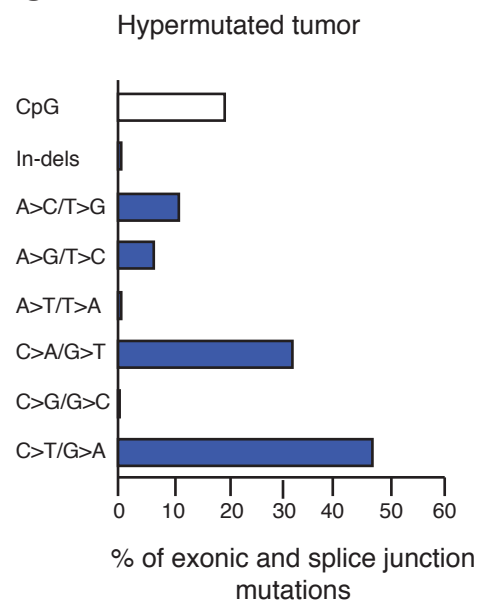

**Supplementary Figure 2. Distribution of 1,544 exonic and splice junction somatic mutations identified by exome sequencing of 13 primary serous endometrial tumors.** (a) Number of nonsynonymous mutations (dark orange), synonymous mutations (light orange), and splice junction mutations (black) in each tumor. T155 (red) is hypermutated, relative to the other 12 tumors. (b) Mutation signatures of the 12 non-hypermuted tumors, and (c) Mutation signature of T155, a hypermutated tumor. The percentage of mutations that were insertions-deletions (in-dels), transitions, or transversions is displayed. The percentage of nucleotide substitutions that occurred within the context of a CpG dinucleotide, relative to all exonic/splice junction mutations, is indicated.

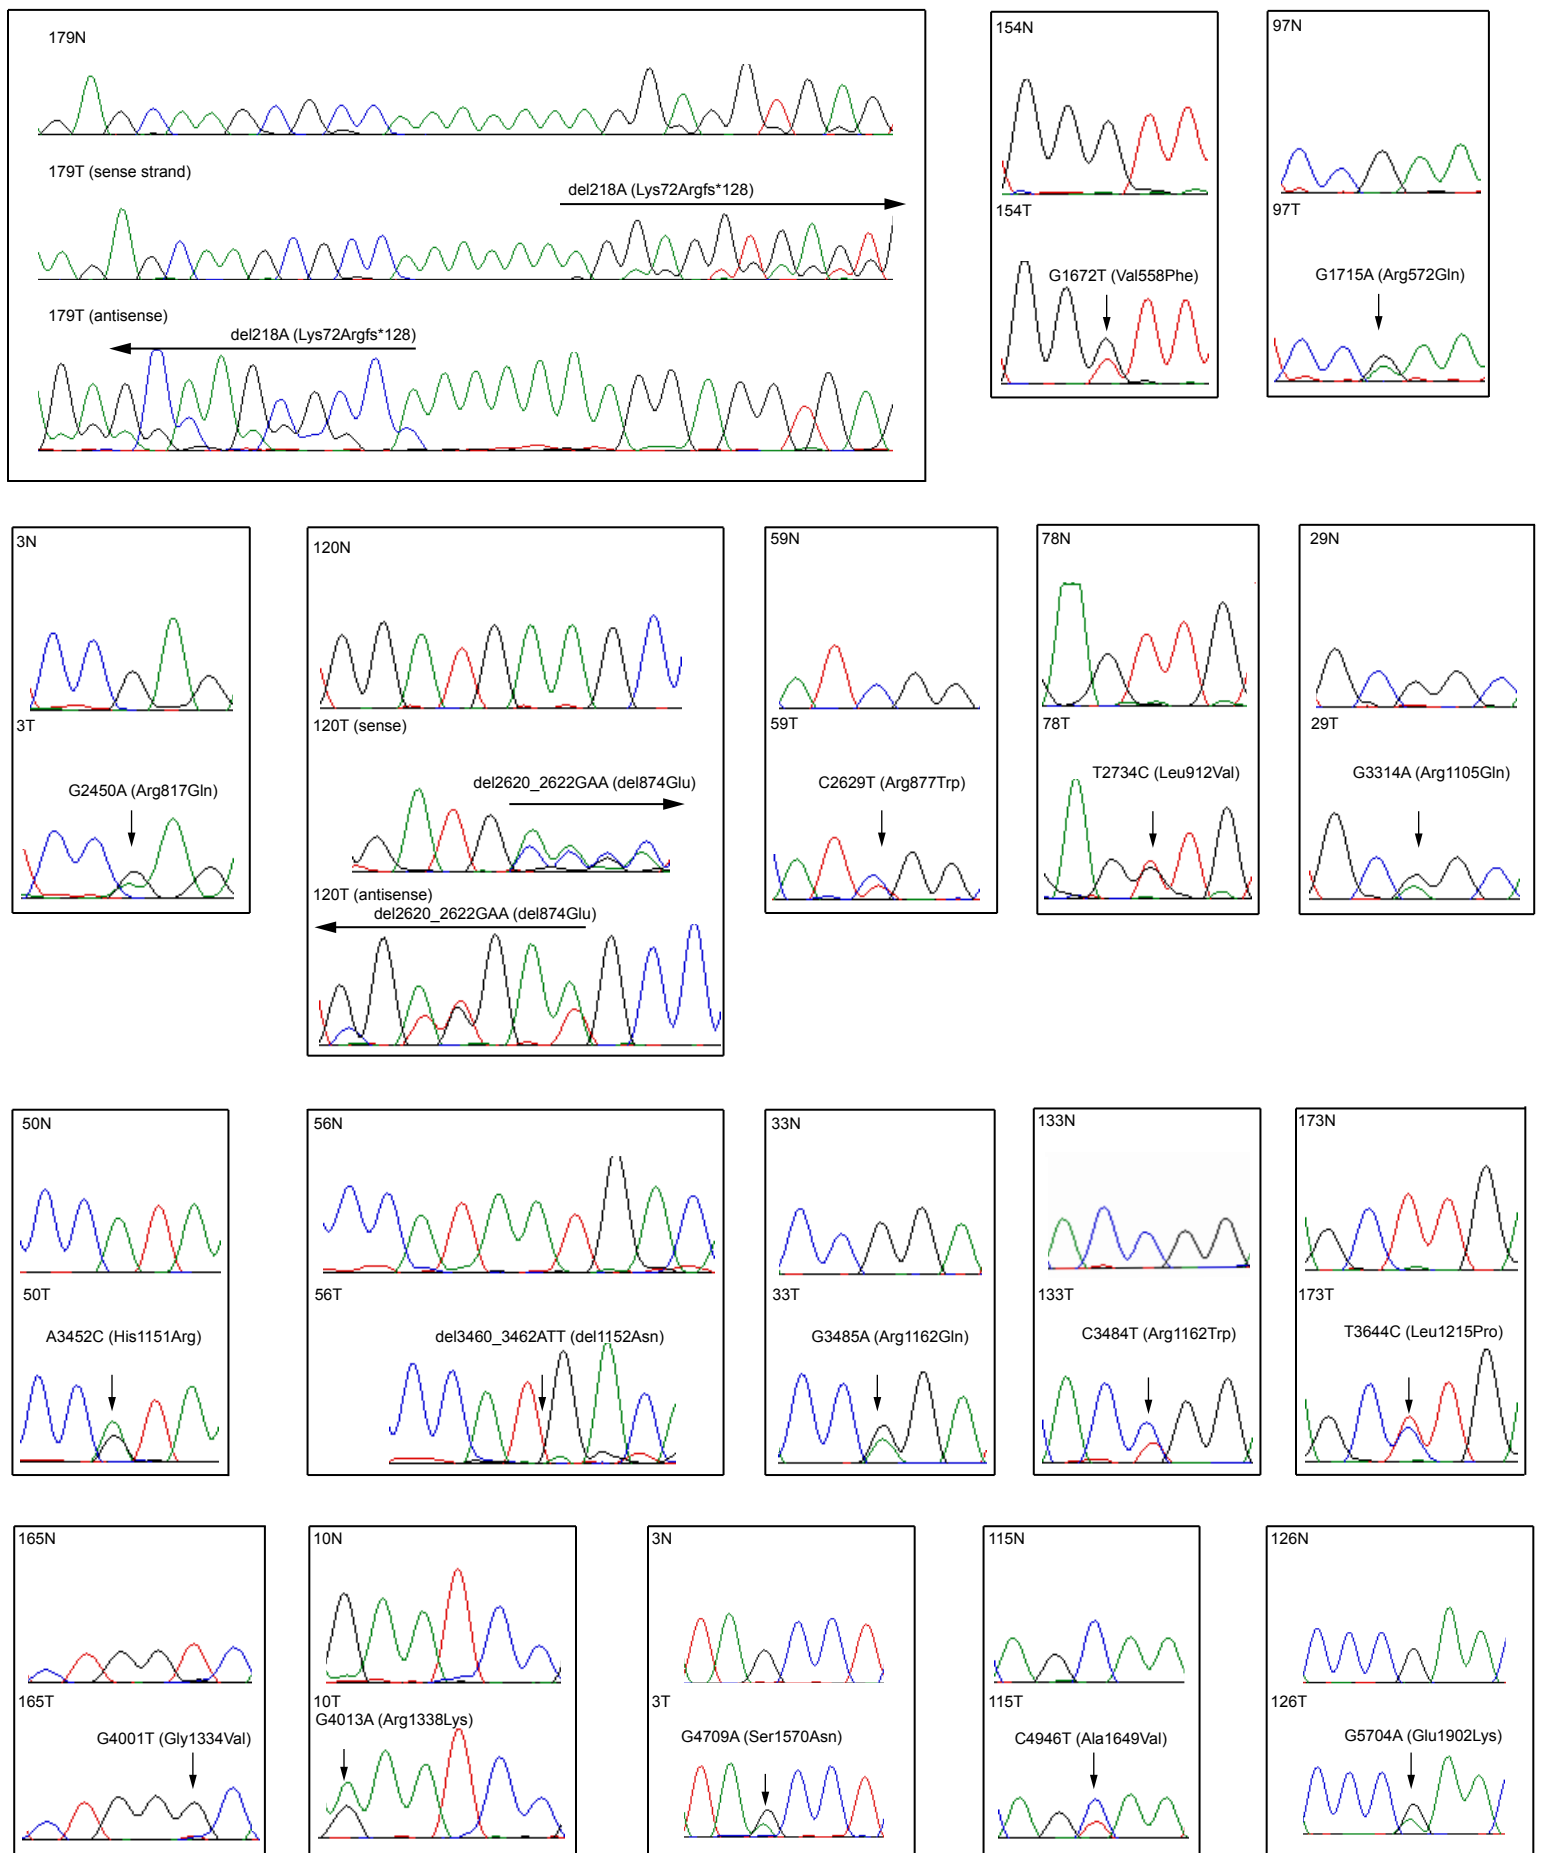

**Supplementary Figure 3. Sequence chromatograms showing somatic mutations in *CHD4*, identified in primary endometrial cancers.** Mutated nucleotide positions in the tumor (T) DNA are indicated by arrows. Nucleotide sequences of the matched normal (N) DNAs are shown for reference.

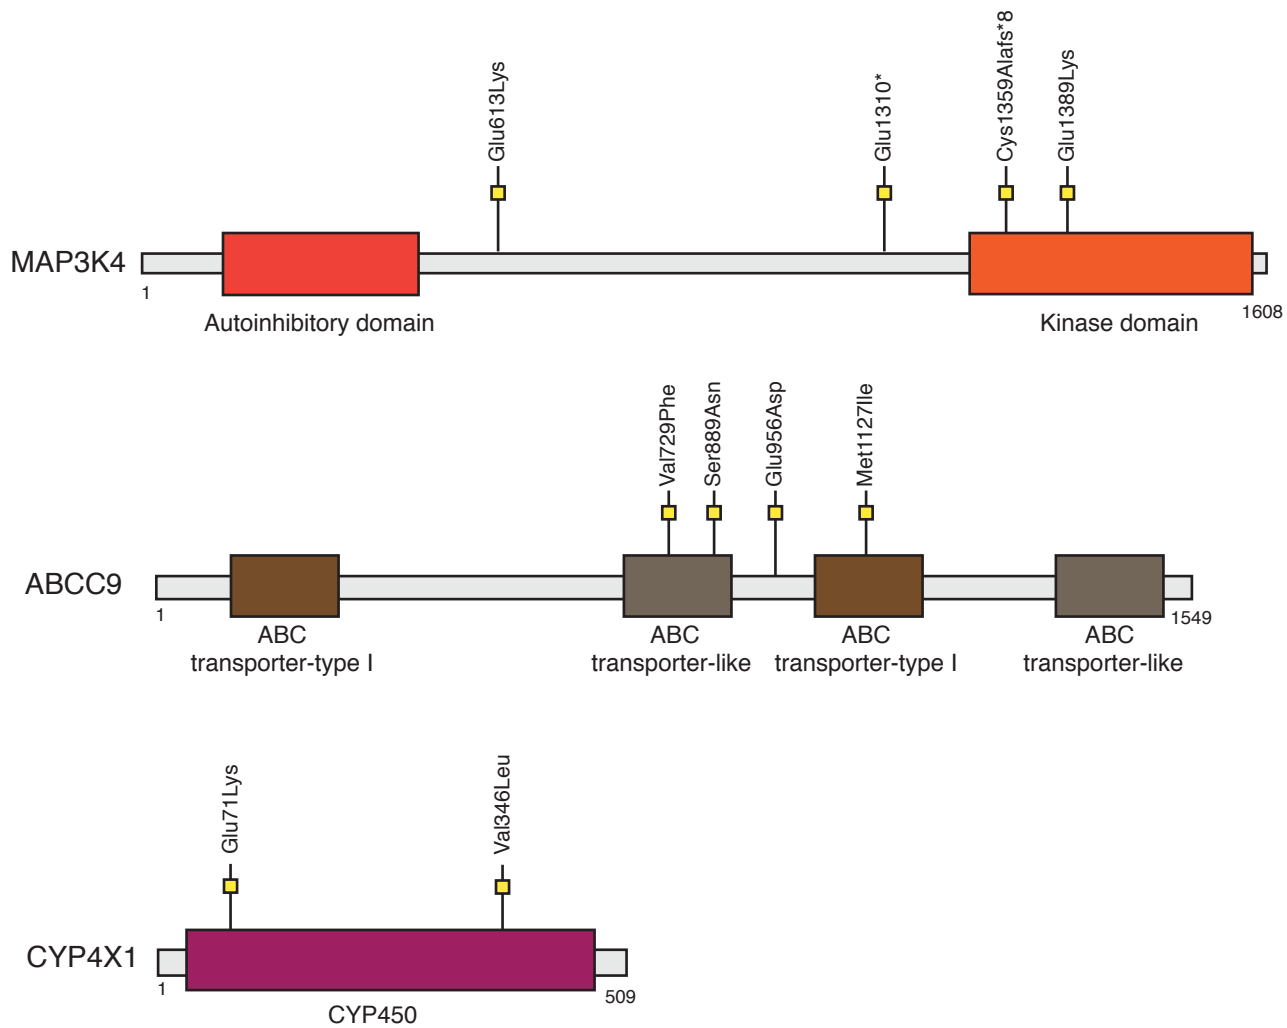

**Supplementary Figure 4. Somatic mutations in MAP3K4, ABCC9, and CYP4X1 in serous endometrial cancers.** Schematic representation of the MAP3K4, ABCC9, and CYP4X1 proteins showing the relative positions of individual somatic mutations identified among primary serous endometrial tumors.

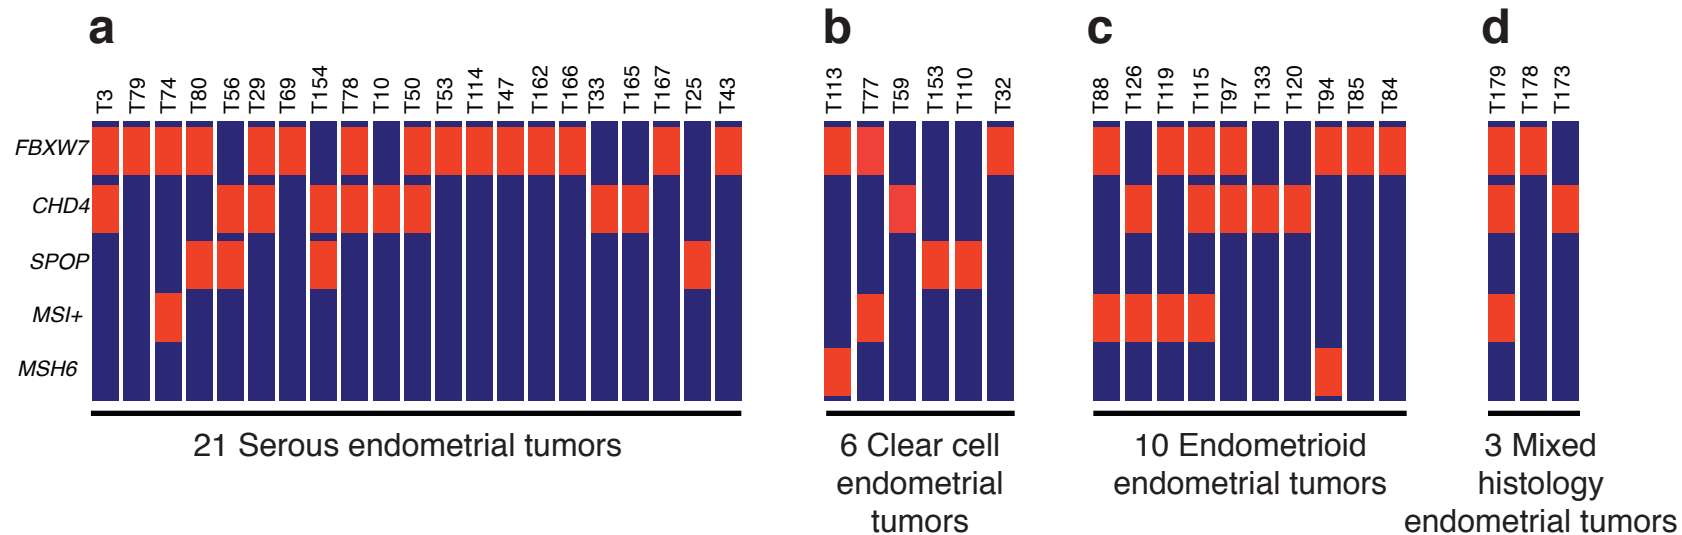

**Supplementary Figure 5. Oncoprints displaying the distribution of somatic mutations in *CHD4*, *FBXW7*, and *SPOP* relative to the microsatellite instability (MSI) status, and the mutational status of *MSH6*, among (a) serous, (b) clear cell, (c) endometrioid, and (d) mixed histology endometrial tumors. Each blue bar represents an individual tumor (T). Nonsynonymous somatic mutations and MSI are indicated by the red bars. Only tumors that had somatically mutated *CHD4*, *FBXW7*, or *SPOP* are displayed.**

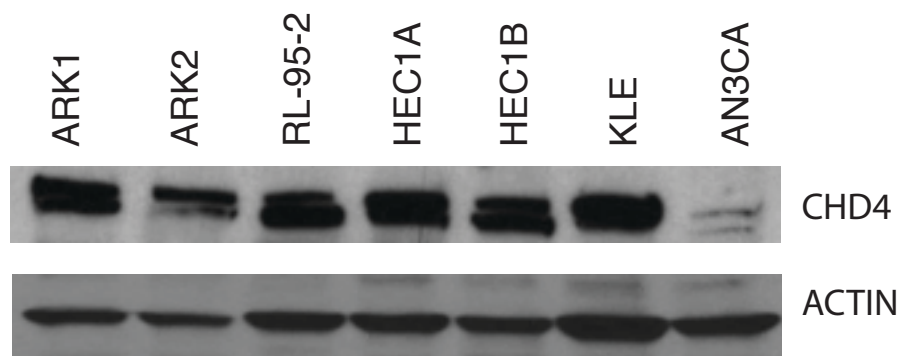

**Supplementary Figure 6. CHD4 is endogenously expressed in endometrial cancer cell lines.** Western blots showing CHD4 levels (top) and actin levels (bottom).

Lys72Argfs\*128

Table A: Multiple sequence alignment of Lys72Argfs\*128 across species including Human, Chimp, Rhesus, Dog, iso1\_Rat, iso2\_Rat, Mouse, Cow, Xenopus, Zebrafish, and C.elegans. Red boxes highlight conserved residues.

Val558Phe Arg572Gln

Table B: Multiple sequence alignment of Val558Phe and Arg572Gln across species. Red boxes highlight conserved residues.

Arg817Gln

del874Glu Arg877Trp

Leu912Val

Table C: Multiple sequence alignment of Arg817Gln, del874Glu Arg877Trp, and Leu912Val across species. Red boxes highlight conserved residues.

His1151Arg

Arg1162Gln

Leu1215Pro

Table D: Multiple sequence alignment of His1151Arg, Arg1162Gln, and Leu1215Pro across species. Red boxes highlight conserved residues.

Gly1334Val

Arg1338Lys

Table E: Multiple sequence alignment of Gly1334Val and Arg1338Lys across species. Red boxes highlight conserved residues.

Ser1570Asn

Ala1649Val

Table F: Multiple sequence alignment of Ser1570Asn and Ala1649Val across species. Red boxes highlight conserved residues.

Glu1902Lys

Table G: Multiple sequence alignment of Glu1902Lys across species. Red boxes highlight conserved residues.

Supplementary Figure 7. Cross-species conservation of CHD4 showing residues mutated in endometrioid cancer (red).

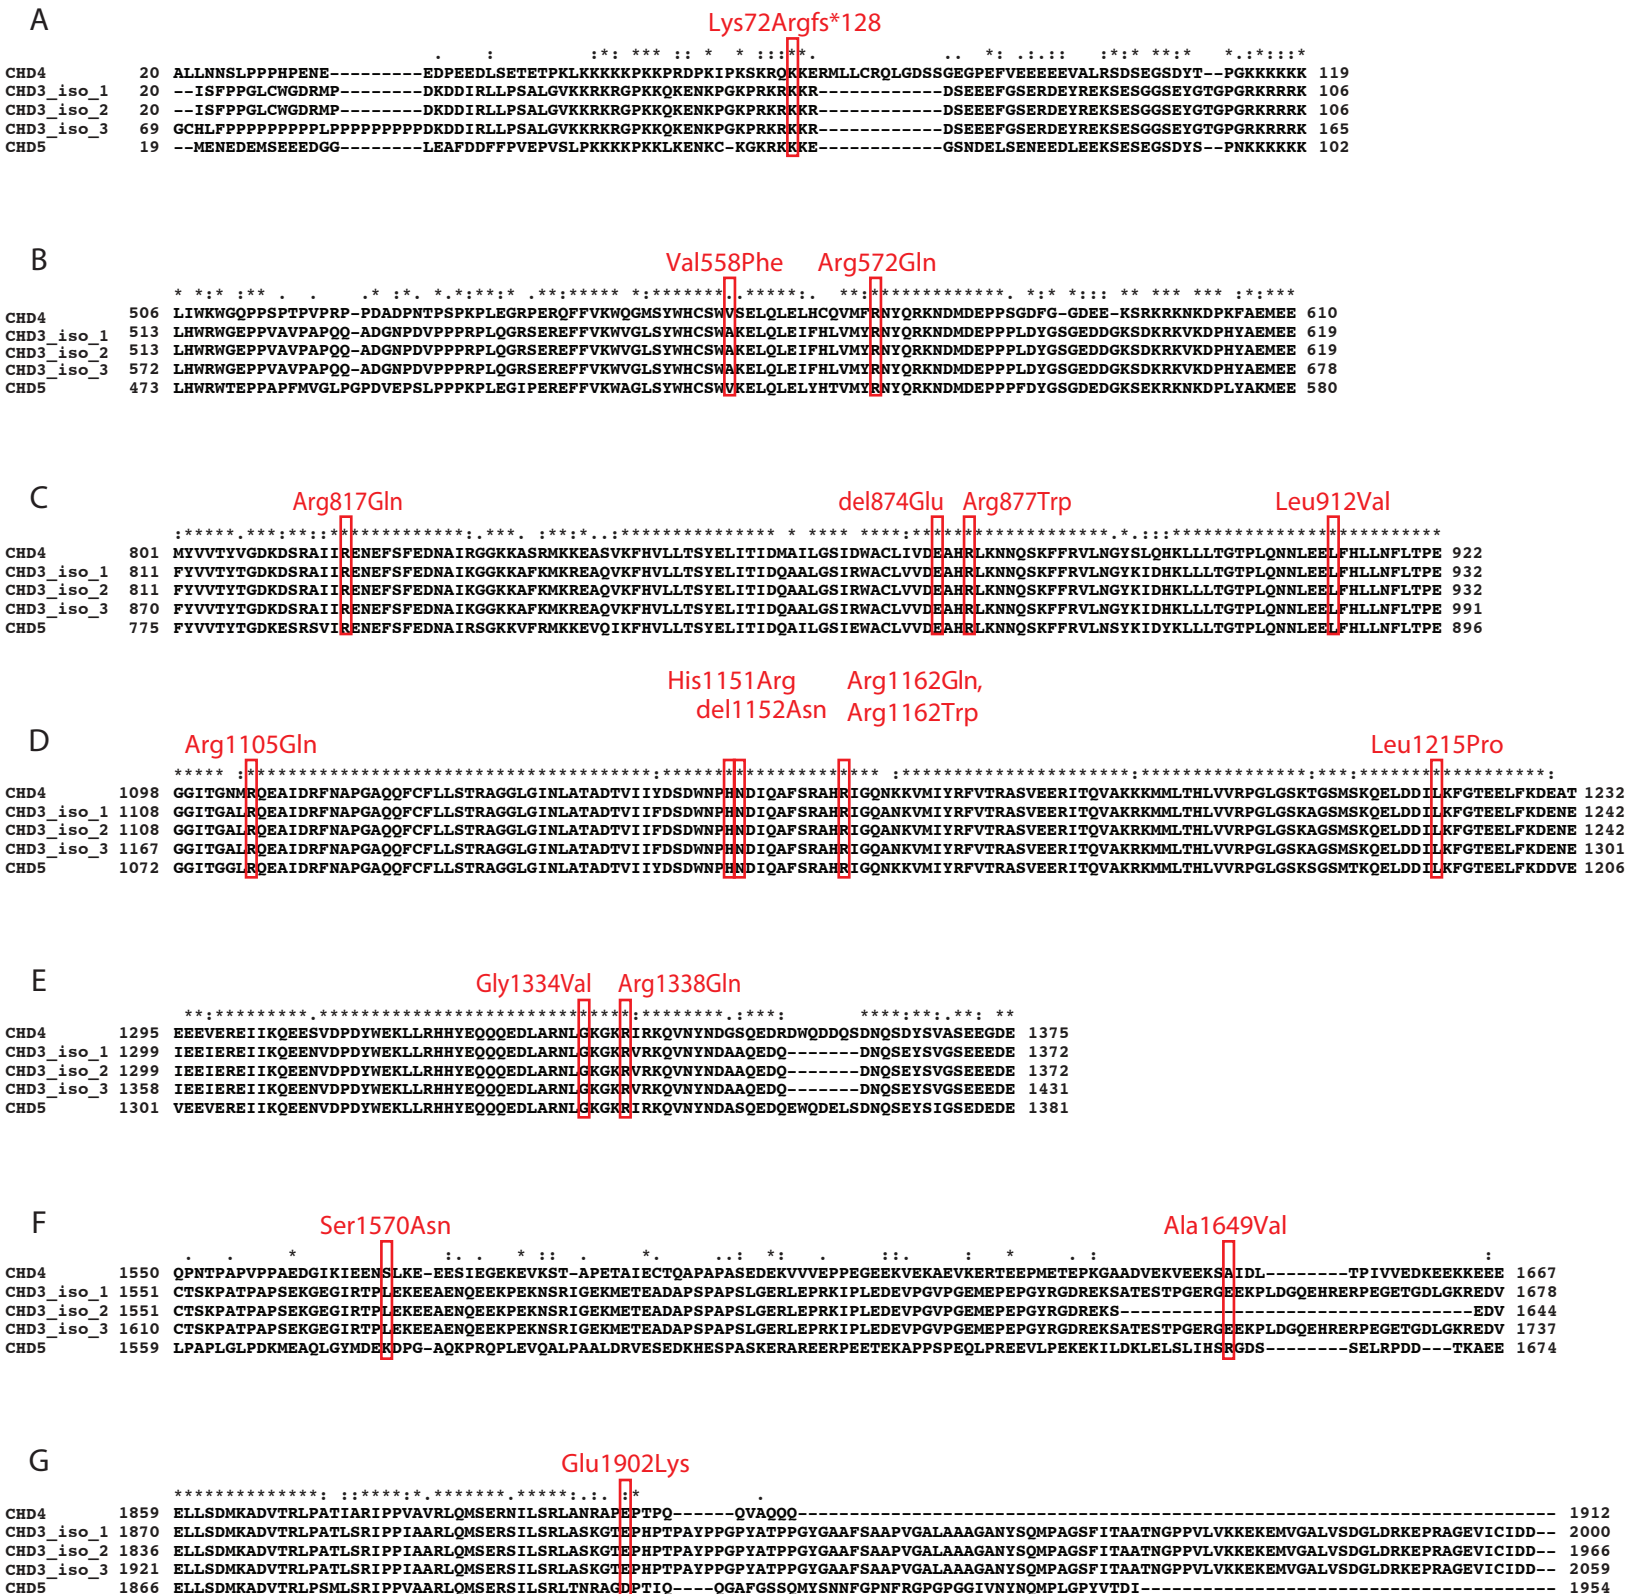

Supplementary Figure 8. Alignment of CHD4 and closely related family members. CHD4 residues mutated in endometrial cancer are indicated in red.

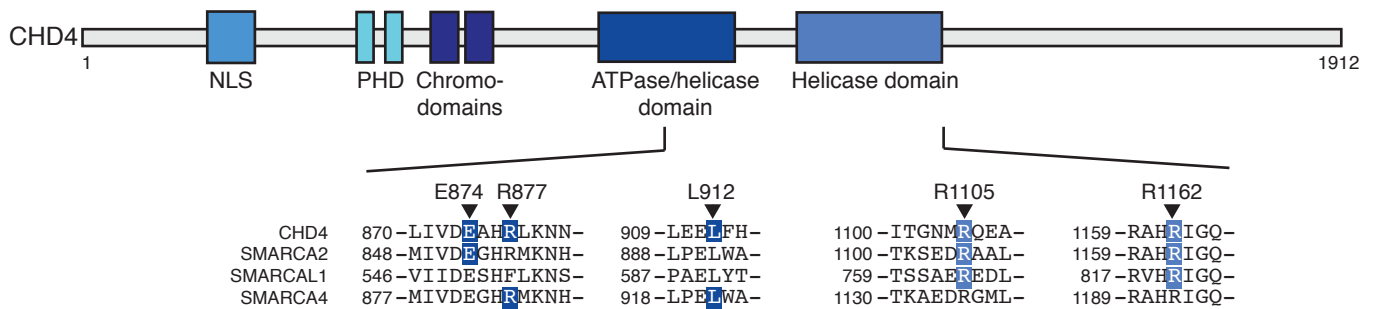

**Supplementary Figure 9. Partial, structure-based, sequence alignment of the ATPase/helicase and helicase domains of CHD4 to the Snf2 domains of SMARCA2, SMARCAL1, and SMARCA4.** Five residues (blue boxes) that are somatically mutated in CHD4 in endometrial cancer, are conserved in SMARCA2, SMARCAL1, and SMARCA4 and undergo pathogenic germline mutations in patients with Nicolaides-Baraister syndrome (SMARCA2), Schimke immuno-osseous dysplasia (SMARCAL1), and Coffin-Siris syndrome (SMARCA4) (references 20-22).



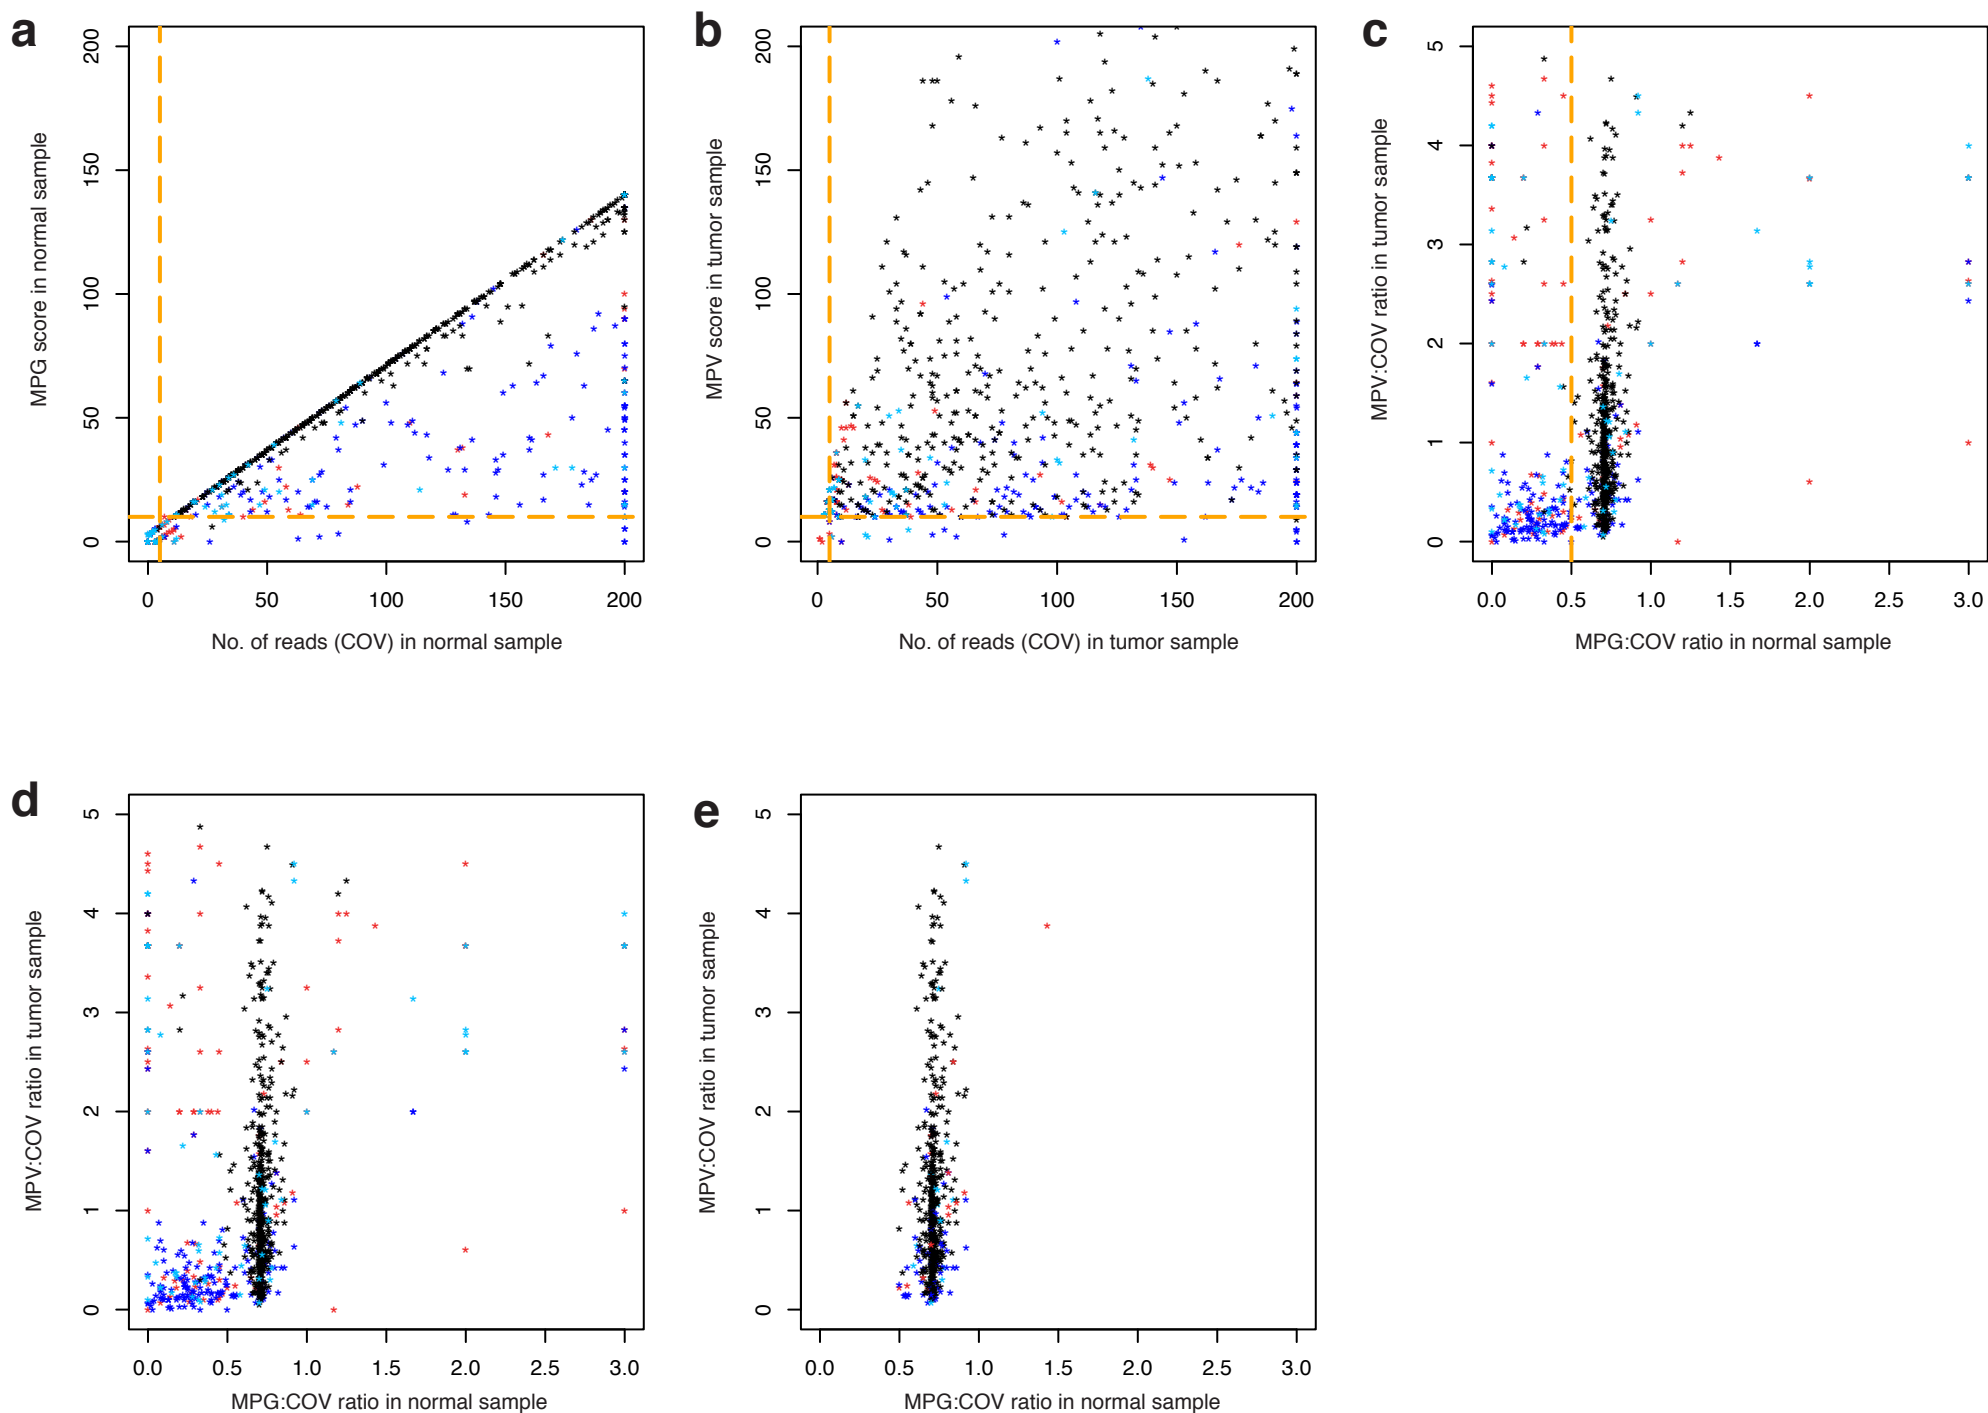

**Supplementary Figure 10. Distribution of somatic variants called by whole exome sequencing (WES) according to score and coverage.** (a-c) Dot plots showing thresholds (orange lines) used to filter the calls to achieve a balance between specificity and sensitivity of somatic mutation detection. Dot plots display variants called as somatic by WES, according to their validation status by Sanger sequencing before (d) and after (e) filtering on score and coverage. Each point represents an individual variant; the validation status of variants is somatic (black), germline (red), not evaluated (light blue), or not detectable in the tumor (dark blue).

**Supplementary Table 2: Depth of whole exome sequencing coverage**

| Sample                                | No. of bases targeted | No. of bases covered | % of targeted bases covered | Average depth of coverage for aligned reads | No. of targeted bases with sufficient coverage and quality for variant calling | % of targeted bases with sufficient coverage and quality for variant calling |
|---------------------------------------|-----------------------|----------------------|-----------------------------|---------------------------------------------|--------------------------------------------------------------------------------|------------------------------------------------------------------------------|
| <i>Tumor samples</i>                  |                       |                      |                             |                                             |                                                                                |                                                                              |
| T27                                   | 37,640,396            | 37,041,467           | 98.41%                      | 100.8                                       | 35,861,300                                                                     | 91.69%                                                                       |
| T33                                   | 51,499,639            | 49,957,360           | 97.01%                      | 150.4                                       | 48,506,495                                                                     | 91.33%                                                                       |
| T45                                   | 37,640,396            | 36,951,637           | 98.17%                      | 105.1                                       | 35,684,195                                                                     | 90.73%                                                                       |
| T47                                   | 51,499,639            | 49,876,467           | 96.85%                      | 94.8                                        | 48,142,085                                                                     | 89.19%                                                                       |
| T56                                   | 51,499,639            | 49,879,322           | 96.85%                      | 120.2                                       | 48,411,478                                                                     | 89.69%                                                                       |
| T65                                   | 51,499,639            | 49,730,719           | 96.57%                      | 75.4                                        | 48,505,619                                                                     | 87.06%                                                                       |
| T69                                   | 51,499,639            | 49,892,083           | 96.88%                      | 119.2                                       | 48,444,093                                                                     | 89.71%                                                                       |
| T70                                   | 51,499,639            | 49,785,681           | 96.67%                      | 74.8                                        | 47,969,296                                                                     | 87.07%                                                                       |
| T75                                   | 51,499,639            | 49,733,051           | 96.57%                      | 69.8                                        | 47,526,230                                                                     | 86.89%                                                                       |
| T80                                   | 37,640,396            | 36,722,341           | 97.56%                      | 70.8                                        | 35,832,195                                                                     | 85.89%                                                                       |
| T154                                  | 51,499,639            | 49,935,941           | 96.96%                      | 126.6                                       | 48,398,890                                                                     | 90.34%                                                                       |
| T155                                  | 51,499,639            | 49,903,701           | 96.90%                      | 128.5                                       | 48,066,638                                                                     | 89.87%                                                                       |
| T162                                  | 51,499,639            | 49,951,052           | 96.99%                      | 101.9                                       | 48,173,519                                                                     | 89.11%                                                                       |
| <i>Matched normal samples</i>         |                       |                      |                             |                                             |                                                                                |                                                                              |
| N27                                   | 37,640,396            | 36,984,288           | 98.26%                      | 102.5                                       | 36,035,725                                                                     | 91.15%                                                                       |
| N33                                   | 51,499,639            | 50,040,094           | 97.17%                      | 124.4                                       | 48,552,347                                                                     | 90.79%                                                                       |
| N45                                   | 37,640,396            | 36,952,879           | 98.17%                      | 81.4                                        | 35,757,557                                                                     | 89.81%                                                                       |
| N47                                   | 51,499,639            | 49,903,532           | 96.90%                      | 95.2                                        | 47,995,032                                                                     | 89.60%                                                                       |
| N56                                   | 51,499,639            | 49,953,739           | 97.00%                      | 117.5                                       | 48,103,183                                                                     | 90.63%                                                                       |
| N65                                   | 51,499,639            | 50,067,103           | 97.22%                      | 72.4                                        | 47,414,952                                                                     | 89.91%                                                                       |
| N69                                   | 51,499,639            | 50,036,195           | 97.16%                      | 127.4                                       | 48,131,346                                                                     | 90.64%                                                                       |
| N70                                   | 51,499,639            | 49,900,106           | 96.89%                      | 80.6                                        | 47,435,488                                                                     | 88.89%                                                                       |
| N75                                   | 51,499,639            | 49,746,618           | 96.60%                      | 69.5                                        | 47,379,192                                                                     | 87.47%                                                                       |
| N80                                   | 37,640,396            | 36,968,802           | 98.22%                      | 117                                         | 34,836,598                                                                     | 91.21%                                                                       |
| N154                                  | 51,499,639            | 49,968,334           | 97.03%                      | 116.2                                       | 48,323,669                                                                     | 90.51%                                                                       |
| N155                                  | 51,499,639            | 49,892,810           | 96.88%                      | 108.9                                       | 48,121,062                                                                     | 89.54%                                                                       |
| N162                                  | 51,499,639            | 50,010,023           | 97.11%                      | 105.5                                       | 47,950,781                                                                     | 89.82%                                                                       |
| <b>Weighted average of all tumors</b> |                       |                      | 97.13%                      | 102.6                                       |                                                                                | 89.53%                                                                       |

**Supplementary Table 3: Exonic somatic mutation rate of the 13 serous endometrial tumors included in the exome discovery screen**

| Tumor ID                       | No. of exonic synonymous somatic mutations | No. of exonic non synonymous somatic mutations | Total no of exonic somatic mutations | No. of covered bp within coding exons | Mutation rate     | Grubbs' Test for outliers approximate P value |
|--------------------------------|--------------------------------------------|------------------------------------------------|--------------------------------------|---------------------------------------|-------------------|-----------------------------------------------|
| T27                            | 3                                          | 8                                              | 11                                   | 26,679,401                            | 4.123.E-07        | 9.079                                         |
| T33                            | 20                                         | 34                                             | 54                                   | 30,495,201                            | 1.771.E-06        | 10.558                                        |
| T45                            | 7                                          | 22                                             | 29                                   | 26,319,267                            | 1.102.E-06        | 9.822                                         |
| T47                            | 27                                         | 62                                             | 89                                   | 29,912,229                            | 2.975.E-06        | 11.909                                        |
| T56                            | 8                                          | 41                                             | 49                                   | 30,175,714                            | 1.624.E-06        | 10.395                                        |
| T65                            | 10                                         | 32                                             | 42                                   | 29,351,564                            | 1.431.E-06        | 10.183                                        |
| T69                            | 3                                          | 24                                             | 27                                   | 30,162,216                            | 8.952.E-07        | 9.598                                         |
| T70                            | 15                                         | 36                                             | 51                                   | 29,345,612                            | 1.738.E-06        | 10.522                                        |
| T75                            | 10                                         | 28                                             | 38                                   | 29,122,936                            | 1.305.E-06        | 10.044                                        |
| T80                            | 11                                         | 37                                             | 48                                   | 25,471,115                            | 1.884.E-06        | 10.684                                        |
| T154                           | 18                                         | 35                                             | 53                                   | 30,266,338                            | 1.751.E-06        | 10.536                                        |
| T162                           | 4                                          | 21                                             | 25                                   | 29,980,154                            | 8.339.E-07        | 9.531                                         |
| T155                           | 203                                        | 803                                            | 1006                                 | 30,070,801                            | 3.345.E-05        | 6.59E-13                                      |
| <b>All Tumors</b>              | <b>339</b>                                 | <b>1183</b>                                    | <b>1522</b>                          | <b>377,352,548</b>                    | <b>4.033.E-06</b> | <b>Not applicable</b>                         |
| <b>Non Hypermutated Tumors</b> | <b>136</b>                                 | <b>380</b>                                     | <b>516</b>                           | <b>347,281,747</b>                    | <b>1.486.E-06</b> | <b>Not applicable</b>                         |

**Supplementary Table 6: Distribution of somatic variants called by whole exome sequencing among 12 tumors in the discovery screen**

| Tumor                                                                  | No. of variants called by exome sequencing (No. of variants confirmed by Sanger sequencing) |               |                          |             |
|------------------------------------------------------------------------|---------------------------------------------------------------------------------------------|---------------|--------------------------|-------------|
|                                                                        | Exonic variants                                                                             |               | Splice Junction variants | Total       |
|                                                                        | Synonymous                                                                                  | Nonsynonymous |                          |             |
| T27                                                                    | 3 (1)                                                                                       | 8 (5)         | 2 (0)                    | 13 (6)      |
| T33                                                                    | 20 (11)                                                                                     | 34 (32)       | 1 (1)                    | 55 (44)     |
| T45                                                                    | 7 (4)                                                                                       | 22 (18)       | 0 (0)                    | 29 (22)     |
| T47                                                                    | 27 (24)                                                                                     | 62 (55)       | 0 (0)                    | 89 (79)     |
| T56                                                                    | 8 (6)                                                                                       | 41 (31)       | 0 (0)                    | 49 (37)     |
| T65                                                                    | 10 (7)                                                                                      | 32 (28)       | 2 (2)                    | 44 (37)     |
| T69                                                                    | 3 (3)                                                                                       | 24 (21)       | 3 (3)                    | 30 (27)     |
| T70                                                                    | 15 (13)                                                                                     | 36 (31)       | 1 (1)                    | 52 (45)     |
| T75                                                                    | 10 (10)                                                                                     | 28 (26)       | 1 (1)                    | 39 (37)     |
| T80                                                                    | 11 (11)                                                                                     | 37 (32)       | 0 (0)                    | 48 (43)     |
| T154                                                                   | 18 (16)                                                                                     | 35 (27)       | 1 (1)                    | 54 (44)     |
| T162                                                                   | 4 (3)                                                                                       | 21 (15)       | 0 (0)                    | 25 (18)     |
| <b>Total</b>                                                           | 136 (109)                                                                                   | 380 (321)     | 11 (9)                   | 527 (439)   |
| <b>Average no. of variants/tumor</b>                                   | 11.3 (9.1)                                                                                  | 31.7 (26.8)   | 0.9 (0.8)                | 43.9 (36.6) |
| <b>Average no. of nonsynonymous and splice junction variants/tumor</b> |                                                                                             | 32.6 (27.5)   |                          |             |

**Supplementary Table 7: Nine genes with validated mutations in more than one tumor in the discovery screen**

| Gene Name      | Transcript Accession Id | Tumor | Nucleotide Change | Amino Acid Change | Mutation Assessor Prediction |
|----------------|-------------------------|-------|-------------------|-------------------|------------------------------|
| <i>TP53</i>    | uc002gij.2              | T47   | c.1009C>T         | p.Arg337Cys       | Medium                       |
| <i>TP53</i>    | uc002gij.2              | T33   | c.1025G>C         | p.Arg342Pro       | Medium                       |
| <i>TP53</i>    | uc002gij.2              | T69   | c.614A>G          | p.Tyr205Cys       | High                         |
| <i>TP53</i>    | uc002gij.2              | T56   | c.309C>A          | p.Tyr103*         | -                            |
| <i>TP53</i>    | uc002gij.2              | T154  | c.1045G>T         | p.Glu349*         | -                            |
| <i>TP53</i>    | uc002gij.2              | T162  | c.814G>C          | p.Val272Leu       | Medium                       |
| <i>TP53</i>    | uc002gij.2              | T65   | c.476C>T          | p.Ala159Val       | Medium                       |
| <i>TP53</i>    | uc002gij.2              | T65   | c.475G>T          | p.Ala159Ser       | High                         |
| <i>TP53</i>    | uc002gij.2              | T70   | c.742C>T          | p.Arg248Trp       | High                         |
| <i>TP53</i>    | uc002gij.2              | T80   | c.422G>A          | p.Cys141Tyr       | High                         |
| <i>PIK3CA</i>  | uc003fjk.1              | T80   | c.263G>A          | p.Arg88Gln        | Medium                       |
| <i>PIK3CA</i>  | uc003fjk.1              | T75   | c.3172A>T         | p.Ile1058Phe      | Low                          |
| <i>PIK3CA</i>  | uc003fjk.1              | T75   | c.3207A>G         | p.*1069insWKDN    | -                            |
| <i>PIK3CA</i>  | uc003fjk.1              | T69   | c.3132T>A         | p.Asn1044Lys      | Low                          |
| <i>FBXW7</i>   | uc003ims.1              | T80   | c.1385C>T         | p.Ser462Phe       | Medium                       |
| <i>FBXW7</i>   | uc003ims.1              | T80   | c.1322G>C         | p.Arg441Pro       | Medium                       |
| <i>FBXW7</i>   | uc003ims.1              | T47   | c.1436G>A         | p.Arg479Gln       | Medium                       |
| <i>FBXW7</i>   | uc003ims.1              | T162  | c.1436G>A         | p.Arg479Gln       | Medium                       |
| <i>FBXW7</i>   | uc003ims.1              | T69   | c.2065C>T         | p.Arg689Trp       | Low                          |
| <i>CHD4</i>    | uc001qpo.1              | T33   | c.3485G>A         | p.Arg1162Gln      | High                         |
| <i>CHD4</i>    | uc001qpo.1              | T154  | c.1672G>T         | p.Val558Phe       | Medium                       |
| <i>CHD4</i>    | uc001qpo.1              | T56   | c.3460_3462delATT | p.Asn1152del      | -                            |
| <i>SPOP</i>    | uc002ipg.1              | T56   | c.240C>G          | p.Ser80Arg        | Medium                       |
| <i>SPOP</i>    | uc002ipg.1              | T80   | c.280C>G          | p.Pro94Ala        | Low                          |
| <i>SPOP</i>    | uc002ipg.1              | T154  | c.362G>A          | p.Arg121Gln       | Medium                       |
| <i>PPP2R1A</i> | uc002pyp.1              | T70   | c.771G>T          | p.Trp257Cys       | Medium                       |
| <i>PPP2R1A</i> | uc002pyp.1              | T65   | c.1757T>C         | p.Leu586Pro       | Medium                       |
| <i>PPP2R1A</i> | uc002pyp.1              | T154  | c.767C>T          | p.Ser256Phe       | Medium                       |
| <i>PPP2R1A</i> | uc002pyp.1              | T69   | c.536C>G          | p.Pro179Arg       | Medium                       |
| <i>MAP3K4</i>  | uc003qtq.1              | T80   | c.4165G>A         | p.Glu1389Lys      | High                         |
| <i>MAP3K4</i>  | uc003qtq.1              | T65   | c.4077delC        | p.Cys1359Alafs*8  | -                            |
| <i>ABCC9</i>   | uc001rfh.1              | T70   | c.2185G>T         | p.Val729Phe       | High                         |
| <i>ABCC9</i>   | uc001rfh.1              | T75   | c.3381G>A         | p.Met1127Ile      | Low                          |
| <i>CYP4X1</i>  | uc001cqr.1              | T75   | c.1036G>C         | p.Val346Leu       | Low                          |
| <i>CYP4X1</i>  | uc001cqr.1              | T56   | c.211G>A          | p.Glu71Lys        | Low                          |

(-) Not evaluated by Mutation Assessor

**Supplementary Table 8: Frequency of TP53, PIK3CA, and PPP2R1A among serous endometrial tumors**

| Gene Name<br>(RefSeq ID;<br>UCSC Transcript<br>Accession ID <sup>^</sup> ) | Mutation<br>frequency in<br>serous tumors | Tumor            | Histology   | Nucleotide Change  | Amino Acid Change             | Mutation type |
|----------------------------------------------------------------------------|-------------------------------------------|------------------|-------------|--------------------|-------------------------------|---------------|
| TP53<br>(NM_001126114;<br>uc002gij.2)                                      | 71% (37/52)                               | T164             | Serous      | c.251delC          | p.Pro84Leufs*38               | Deletion      |
|                                                                            |                                           | T56              | Serous      | c.309C>A           | p.Tyr103*                     | Nonsense      |
|                                                                            |                                           | T52              | Serous      | c.377A>G           | p.Tyr126Cys                   | Missense      |
|                                                                            |                                           | T45              | Serous      | c.395A>G           | p.Lys132Arg                   | Missense      |
|                                                                            |                                           | T50              | Serous      | c.399_400insTT     | p.Met133_Phe134insFfs*35      | Insertion     |
|                                                                            |                                           | T10 (OM-2009-C1) | Serous      | c.406C>G           | p.Gln136Glu                   | Missense      |
|                                                                            |                                           | T80              | Serous      | c.422G>A           | p.Cys141Tyr                   | Missense      |
|                                                                            |                                           | T41              | Serous      | c.434T>C           | p.Leu145Pro                   | Missense      |
|                                                                            |                                           | T65              | Serous      | c.475G>T           | p.Ala159Phe                   | Missense      |
|                                                                            |                                           | T65              | Serous      | c.476C>T           | p.Ala159Phe                   | Missense      |
|                                                                            |                                           | T29              | Serous      | c.536A>G           | p.His179Arg                   | Missense      |
|                                                                            |                                           | T165             | Serous      | c.538G>T           | p.Glu180*                     | Nonsense      |
|                                                                            |                                           | T69              | Serous      | c.614A>G           | p.Tyr205Cys                   | Missense      |
|                                                                            |                                           | T55              | Serous      | c.637C>T           | p.Arg213*                     | Nonsense      |
|                                                                            |                                           | T163             | Serous      | c.641A>G           | p.His214Arg                   | Missense      |
|                                                                            |                                           | T83              | Serous      | c.722C>G           | p.S241Cys                     | Missense      |
|                                                                            |                                           | T185             | Serous      | c.722C>T           | p.S241Phe                     | Missense      |
|                                                                            |                                           | T75              | Serous      | c.731G>T           | p.G244Val                     | Missense      |
|                                                                            |                                           | T71              | Serous      | c.733G>A           | p.G245Ser                     | Missense      |
|                                                                            |                                           | T78              | Serous      | c.733G>A           | p.G245Ser                     | Missense      |
|                                                                            |                                           | T76              | Serous      | c.734G>A           | p.G245Asp                     | Missense      |
|                                                                            |                                           | T51              | Serous      | c.739delA          | p.Asn247Thrfs*98              | Deletion      |
|                                                                            |                                           | T23              | Serous      | c.742C>G           | p.Arg248Trp                   | Missense      |
|                                                                            |                                           | T66              | Serous      | c.742C>T           | p.Arg248Trp                   | Missense      |
|                                                                            |                                           | T70              | Serous      | c.742C>T           | p.Arg248Trp                   | Missense      |
|                                                                            |                                           | T8 (OM-2511-C1)  | Serous      | c.743G>A           | p.Arg248Gln                   | Missense      |
|                                                                            |                                           | T68              | Serous      | c.763A>T           | p.Ile255Phe                   | Missense      |
|                                                                            |                                           | T112             | Serous      | c.764T>C           | p.Ile255Thr                   | Missense      |
|                                                                            |                                           | T162             | Serous      | c.814G>C           | p.Val272Leu                   | Missense      |
|                                                                            |                                           | T114             | Serous      | c.817C>T           | p.Arg273Cys                   | Missense      |
|                                                                            |                                           | T167             | Serous      | c.818G>A           | p.Arg273His                   | Missense      |
|                                                                            |                                           | T185             | Serous      | c.818G>A           | p.Arg273His                   | Missense      |
|                                                                            |                                           | T30              | Serous      | c.824G>T           | p.Cys275Phe                   | Missense      |
| T166                                                                       | Serous                                    | c.830G>T         | p.Cys277Phe | Missense           |                               |               |
| T53                                                                        | Serous                                    | c.841G>A         | p.Asp281Asn | Missense           |                               |               |
| T107                                                                       | Serous                                    | c.841G>C         | p.Asp281His | Missense           |                               |               |
| T75                                                                        | Serous                                    | c.844C>T         | p.Arg282Trp | Missense           |                               |               |
| T47                                                                        | Serous                                    | c.1009C>T        | p.Arg337Cys | Missense           |                               |               |
| T33                                                                        | Serous                                    | c.1025G>C        | p.Arg342Pro | Missense           |                               |               |
| T154                                                                       | Serous                                    | c.1045G>T        | p.Glu349*   | Nonsense           |                               |               |
| PIK3CA<br>(NM_006218.1;<br>uc003fjk.1) ‡                                   | 31% (16/52)                               | T75              | Serous      | c.3207A>G          | p.*1069_*1069insTrpLysAspAsn* | Insertion     |
|                                                                            |                                           | T3 (OM-1323-C1)  | Serous      | c.241G>A           | p.Glu81Lys                    | Missense      |
|                                                                            |                                           | T10 (OM-2009-C1) | Serous      | c.1634A>C          | p.Glu545Ala                   | Missense      |
|                                                                            |                                           | T41              | Serous      | c.42_64delinsTCCAA | p.Leu15_Val22insProlle        | Insertion     |
|                                                                            |                                           | T29              | Serous      | c.1624G>A          | p.Glu542Lys                   | Missense      |
|                                                                            |                                           | T49              | Serous      | c.1624G>C          | p.Glu542Gln                   | Missense      |
|                                                                            |                                           | T53              | Serous      | c.1637A>C          | p.Gln546Lys                   | Missense      |
|                                                                            |                                           | T68              | Serous      | c.263G>A           | p.Arg88Gln                    | Missense      |
|                                                                            |                                           | T68              | Serous      | c.323G>A           | p.Arg108His                   | Missense      |
|                                                                            |                                           | T69              | Serous      | c.3132T>A          | p.Asn1044Lys                  | Missense      |
|                                                                            |                                           | T71              | Serous      | c.1093G>A          | p.Glu365Lys                   | Missense      |
|                                                                            |                                           | T74              | Serous      | c.3139C>T          | p.H1047Tyr                    | Missense      |
|                                                                            |                                           | T74              | Serous      | c.278G>A           | p.Arg93Gln                    | Missense      |
|                                                                            |                                           | T74              | Serous      | c.333G>T           | p.Lys111Asn                   | Missense      |
|                                                                            |                                           | T75              | Serous      | c.3172A>T          | p.Ile1058Phe                  | Missense      |
|                                                                            |                                           | T76              | Serous      | c.1357G>A          | p.Glu453Lys                   | Missense      |
|                                                                            |                                           | T78              | Serous      | c.331A>G           | p.Lys111Glu                   | Missense      |
|                                                                            |                                           | T79              | Serous      | c.3073A>G          | p.Thr1025Ala                  | Missense      |
|                                                                            |                                           | T80              | Serous      | c.263G>A           | p.Arg88Gln                    | Missense      |
|                                                                            |                                           | T81              | Serous      | c.3140A>G          | p.H1047Arg                    | Missense      |
| PPP2R1A<br>(NM_014225;<br>uc002pyp.1)                                      | 25% (13/52)                               | T51              | Serous      | c.536C>G           | p.Pro179Arg                   | Missense      |
|                                                                            |                                           | T69              | Serous      | c.536C>G           | p.Pro179Arg                   | Missense      |
|                                                                            |                                           | T83              | Serous      | c.536C>G           | p.Pro179Arg                   | Missense      |
|                                                                            |                                           | T107             | Serous      | c.536C>G           | p.Pro179Arg                   | Missense      |
|                                                                            |                                           | T164             | Serous      | c.536C>G           | p.Pro179Arg                   | Missense      |
|                                                                            |                                           | T50              | Serous      | c.767C>G           | p.Ser256Phe                   | Missense      |
|                                                                            |                                           | T108             | Serous      | c.767C>G           | p.Ser256Phe                   | Missense      |
|                                                                            |                                           | T154             | Serous      | c.767C>G           | p.Ser256Phe                   | Missense      |
|                                                                            |                                           | T76              | Serous      | c.770C>G           | p.Trp257Ser                   | Missense      |
|                                                                            |                                           | T23              | Serous      | c.771C>G           | p.Trp257Cys                   | Missense      |
|                                                                            |                                           | T55              | Serous      | c.771C>G           | p.Trp257Cys                   | Missense      |
| T70                                                                        | Serous                                    | c.771C>G         | p.Trp257Cys | Missense           |                               |               |
| T65                                                                        | Serous                                    | c.1757T>C        | p.Leu586Pro | Missense           |                               |               |

<sup>^</sup>UCSC transcript IDs are based on the hg18 assembly of the human genome sequence

‡ Previously reported in Rudd et al. (ref 6)



**Supplementary Table 10: Mutation rate of individual genes in 52 serous tumors, compared to thecalculated background mutation rate for serous endometrial cancers**

| Gene Name           | No. of covered bp within coding sequence | No. of somatic mutations | Number of genes assayed in discovery screen | Average background mutation rate in 12 discovery screen tumors (excluding T155) |                                                                |                                                               |                 |                                |                                          | Average background mutation rate all 13 discovery screen tumors |                                                                |                                                               |                 |                                |                                          |
|---------------------|------------------------------------------|--------------------------|---------------------------------------------|---------------------------------------------------------------------------------|----------------------------------------------------------------|---------------------------------------------------------------|-----------------|--------------------------------|------------------------------------------|-----------------------------------------------------------------|----------------------------------------------------------------|---------------------------------------------------------------|-----------------|--------------------------------|------------------------------------------|
|                     |                                          |                          |                                             | Background mutation rate calculated from discovery screen data                  | Expected number of mutations based on background mutation rate | Poisson P-value (one-tailed) for observed number of mutations | Rank of P-value | q-value (False Discovery Rate) | CaMP-like Score (-log <sub>10</sub> (q)) | Background mutation rate calculated from discovery screen data  | Expected number of mutations based on background mutation rate | Poisson P-value (one-tailed) for observed number of mutations | Rank of P-value | q-value (False Discovery Rate) | CaMP-like Score (-log <sub>10</sub> (q)) |
| <i>FBXW7</i>        | 2121                                     | 20                       | 21441                                       | 1.486E-06                                                                       | 0.1638746                                                      | 5.3515E-37                                                    | 1               | 1.15E-32                       | 31.940                                   | 4.033E-06                                                       | 0.4448477                                                      | 5.2452E-28                                                    | 1               | 1.12E-23                       | 22.949                                   |
| <i>CHD4</i>         | 5244                                     | 10                       | 21441                                       | 1.486E-06                                                                       | 0.4051667                                                      | 8.3511E-13                                                    | 2               | 8.95E-09                       | 8.048                                    | 4.033E-06                                                       | 1.0998498                                                      | 2.6138E-08                                                    | 2               | 2.80E-04                       | 3.553                                    |
| <i>SPOP</i>         | 1122                                     | 4                        | 21441                                       | 1.486E-06                                                                       | 0.0866890                                                      | 3.7957E-08                                                    | 3               | 2.71E-04                       | 3.567                                    | 4.033E-06                                                       | 0.2353226                                                      | 4.9455E-06                                                    | 3               | 3.53E-02                       | 1.452                                    |
| <i>TSPYL2</i>       | 1725                                     | 3                        | 21441                                       | 1.486E-06                                                                       | 0.1332785                                                      | 1.1820E-05                                                    | 4               | 6.34E-02                       | 1.198                                    | 4.033E-06                                                       | 0.3617927                                                      | 5.3543E-04                                                    | 4               | 2.87                           | -0.458                                   |
| <i>ABCC9</i>        | 4647                                     | 4                        | 21441                                       | 1.486E-06                                                                       | 0.3590408                                                      | 3.6912E-05                                                    | 5               | 1.58E-01                       | 0.801                                    | 4.033E-06                                                       | 0.9746381                                                      | 3.2857E-03                                                    | 5               | 14.09                          | -1.149                                   |
| <i>MAP3K4</i>       | 4672                                     | 4                        | 21441                                       | 1.486E-06                                                                       | 0.3609723                                                      | 3.7855E-05                                                    | 6               | 1.35E-01                       | 0.869                                    | 4.033E-06                                                       | 0.9798815                                                      | 3.3607E-03                                                    | 6               | 12.01                          | -1.080                                   |
| <i>KDM4B/JMJD2B</i> | 2973                                     | 3                        | 21441                                       | 1.486E-06                                                                       | 0.2297026                                                      | 9.6595E-05                                                    | 7               | 2.96E-01                       | 0.529                                    | 4.033E-06                                                       | 0.6235419                                                      | 3.8454E-03                                                    | 7               | 11.78                          | -1.071                                   |
| <i>CYP4X1</i>       | 1527                                     | 2                        | 21441                                       | 1.486E-06                                                                       | 0.1179805                                                      | 2.5059E-04                                                    | 9               | 5.97E-01                       | 0.224                                    | 4.033E-06                                                       | 0.3202652                                                      | 4.3143E-03                                                    | 8               | 11.56                          | -1.063                                   |
| <i>TRIM16</i>       | 1692                                     | 2                        | 21441                                       | 1.486E-06                                                                       | 0.1307289                                                      | 3.3769E-04                                                    | 11              | 6.58E-01                       | 0.182                                    | 4.033E-06                                                       | 0.3548715                                                      | 5.7216E-03                                                    | 9               | 13.63                          | -1.135                                   |
| <i>ARID1A</i>       | 5718                                     | 4                        | 21441                                       | 1.486E-06                                                                       | 0.4417893                                                      | 9.7245E-05                                                    | 8               | 2.61E-01                       | 0.584                                    | 4.033E-06                                                       | 1.1992642                                                      | 7.7267E-03                                                    | 10              | 16.57                          | -1.219                                   |
| <i>YEATS4</i>       | 681                                      | 1                        | 21441                                       | 1.486E-06                                                                       | 0.0526160                                                      | 1.3366E-03                                                    | 12              | 2.39                           | -0.378                                   | 4.033E-06                                                       | 0.1428295                                                      | 9.2790E-03                                                    | 11              | 18.09                          | -1.257                                   |
| <i>EP300</i>        | 7148                                     | 4                        | 21441                                       | 1.486E-06                                                                       | 0.5522753                                                      | 2.7107E-04                                                    | 10              | 5.81E-01                       | 0.236                                    | 4.033E-06                                                       | 1.4991851                                                      | 1.8538E-02                                                    | 12              | 33.12                          | -1.520                                   |
| <i>BAZIB</i>        | 4452                                     | 2                        | 21441                                       | 1.486E-06                                                                       | 0.3439745                                                      | 5.2525E-03                                                    | 13              | 8.66                           | -0.938                                   | 4.033E-06                                                       | 0.9337398                                                      | 6.8526E-02                                                    | 13              | 113.02                         | -2.053                                   |
| <i>CTCF</i>         | 2181                                     | 1                        | 21441                                       | 1.486E-06                                                                       | 0.1685104                                                      | 1.2699E-02                                                    | 14              | 19.45                          | -1.289                                   | 4.033E-06                                                       | 0.4574318                                                      | 7.7581E-02                                                    | 14              | 118.82                         | -2.075                                   |
| <i>HDAC7</i>        | 2491                                     | 1                        | 21441                                       | 1.486E-06                                                                       | 0.1924619                                                      | 1.6307E-02                                                    | 15              | 23.31                          | -1.368                                   | 4.033E-06                                                       | 0.5224496                                                      | 9.7087E-02                                                    | 15              | 138.78                         | -2.142                                   |

The background mutation rates are calculated based on the tumors that were in the discovery screen; the mutation rate of individual genes is based on 52 tumors (12 in the discovery screen tumors and 40 prevalence screen tumors).



**Supplementary Table 12: MSI status and MSH6 status of endometrial tumors with CHD4, FBXW7, and SPOP mutations**

| Pair-wise comparison                                 | Frequency in Serous Tumors * | Frequency in Clear Cell Tumors | Frequency in Endometrioid Tumors ** | Frequency in Mixed Histology Tumors |
|------------------------------------------------------|------------------------------|--------------------------------|-------------------------------------|-------------------------------------|
| <i>CHD4</i> mutant/MSI STABLE- <i>MSH6</i> WILDTYPE  | 9 of 48 (18.8%)              | 1 of 18 (5.5%)                 | 3 of 41 (7.3%)                      | 1 of 15 (6.7%)                      |
| <i>CHD4</i> mutant/MSI UNSTABLE- <i>MSH6</i> MUTANT  | 0 of 3 (0%)                  | 0 of 5 (0%)                    | 2 of 25 (8.0%)                      | 1 of 3 (33.3%)                      |
| P-value                                              | 1                            | 1                              | 1                                   | 0.3137                              |
| <i>FBXW7</i> mutant/MSI STABLE- <i>MSH6</i> WILDTYPE | 14 of 48 (29.2%)             | 1 of 18 (5.5%)                 | 3 of 41 (7.3%)                      | 1 of 15 (6.7%)                      |
| <i>FBXW7</i> mutant/MSI UNSTABLE- <i>MSH6</i> MUTANT | 1 of 3 (33.3%)               | 2 of 5 (40%)                   | 4 of 25 (16%)                       | 1 of 3 (33.3%)                      |
| P-value                                              | 1                            | 0.1073                         | 0.4122                              | 0.3137                              |
| <i>SPOP</i> mutant/MSI STABLE- <i>MSH6</i> WILDTYPE  | 4 of 48 (8.3%)               | 2 of 18 (11.1%)                | 0 of 41 (0%)                        | 0 of 15 (0%)                        |
| <i>SPOP</i> mutant/MSI UNSTABLE- <i>MSH6</i> MUTANT  | 0 of 3 (0%)                  | 0 of 5 (0%)                    | 0 of 25 (0%)                        | 0 of 3 (0%)                         |
| P-value                                              | 1                            | 1                              | 1                                   | 1                                   |

P-value (Fisher's Exact test of significance, 2-tailed)

\* The MSI status for 1 of 52 serous tumors could not be determined

\*\* The MSI status for 1 of 67 endometrioid tumors could not be determined

Supplementary Table 14: Networks identified by Ingenuity Pathway Analysis

| Network ID | Molecules in Network                                                                                                                                                                                                                                                                                                                                                                                                                                                                                                                                                                                                                    | Score | Focus Molecules | Top Functions                                                                                       |
|------------|-----------------------------------------------------------------------------------------------------------------------------------------------------------------------------------------------------------------------------------------------------------------------------------------------------------------------------------------------------------------------------------------------------------------------------------------------------------------------------------------------------------------------------------------------------------------------------------------------------------------------------------------|-------|-----------------|-----------------------------------------------------------------------------------------------------|
| 1          | Actin, ARHGFE2, ATM, CHD4, CHKA, Creb, CTCF (includes EG:10664), Cyclin E, CYP11B2, DMD, EP300, FBXW7, FLNA, hCG, Histone h3, Histone h4, LHCGR, MAGEC2/MAGEC3, mediator, NUMA1, PEX2 (includes EG:19302), PLAA, POLR1A, RFX5, Rnr, SIN3A, SLC26A3, SMC3, SMC4, TIP60, TP53 (includes EG:22059), TRRAP, TSPYL2, YEATS4, ZBTB33 AMPH, ANO3, ANXA5, CD3, CDCA7, CDH11, DSG3, ERBB2, ERK, ERK1/2, Focal adhesion kinase, GPER, GRM1, HGF, IL2RG, IRS4 (includes EG:16370), ITCH, ITGA3, MAP2K1/2, MAP4K4, Mapk, Mek, Nfkb (complex), P38 MAPK, p85 (pik3r), PI3K (complex), PIK3CA, PPP2R1A, PPP2R2A, PUS7, RNF128, SPDEF, SPTB, TCR, TLR7 | 38    | 26              | DNA Replication, Recombination, and Repair, Gene Expression, Cancer                                 |
| 2          | ABCA3, AGTR1, ATAD2, C3, CCND1, CDCA7, DNMT3B, DPY30, EMR3, ESR1, EZH2, FHOD3, GPR77, HAMP, HDAC7, HFE2, HK3, HNRNP2, KANSL1, KCNA1, KCNQ5, LIMCH1, MGA, MLL, NFO1, NFR1, PNRC1, RBMS3, RECK, SLC9B2, SRPK2, TGFB2, TGM2, TMPO, WDFY3 AKR1C3, CALD1, CCD82, CEP63, COL7A1, CRMP1, CTDSP2, DISC1, DST, EGFR, ERBB2, estrogen receptor, GRM5, HDC, HFE, HM13, HSPA5, JUN, KHSRP, KIF1A, KRT7, MAPK1, MPHOSPH9, PCDH7, PCDHA9, PGR (includes EG:18667), PTPRK, SBDS, SMAD1, SORCS1, SPAG16, SPOCK1, SYNE1, TNXB, WNT5B                                                                                                                     | 32    | 23              | Cellular Movement, Cell Morphology, Tissue Morphology                                               |
| 3          | ABLIM, ACSL4, ACTG1, ACVR2A, ADCY7, AKAP9, ANKS1B, ARHGAP35, ATP9A, BCR (complex), CXCR4, DIAPH3, DUSP3, DYRK3, EPST11, ERG, FSH, GNLY, Lh, LOC81691, LPXN, MT3, P4HA2, PDXK, PCLC1, PPFIA4, PRIC285, PTGS2, RA B33B, RGS5, SATB1, SPTBN5, TPM2, TRIOBP, VAV1                                                                                                                                                                                                                                                                                                                                                                           | 18    | 16              | Developmental Disorder, Hematological Disease, Hereditary Disorder                                  |
| 4          | ACTBL2, BGN, CACNA1D, CCNA2, CD40LG, CD79A, CDKN1A, COL3A1, CUX1, EIF3M, ESRRG, GAL3ST1, GCH1, HIF1A, HIF1AN, HSPB2, IFIT5, IFNG (includes EG:15978), Igm, KDM4B, MAPK9, MARCKSL1, MRC1 (includes EG:100286774), NF1 (includes EG:18015), NOV, PLEK, POLI, PPP2CA, PPP2R3A, SGOL1, SMTN, SPAG4, TGFBI (includes EG:21803), TYMP, ZFP36L1                                                                                                                                                                                                                                                                                                | 17    | 15              | Endocrine System Development and Function, Small Molecule Biochemistry, Cell Cycle                  |
| 5          | ACTL6A, ADAM9, ADNP, ARID1A, ATP6AP1, BAF110, CCNC, CD46, CDK5, CSPG4, CTSS, EXT2, FAN1, FHL2, ITGA10, ITGB1, LIG3, MSH6, PDP1, PHLD B1, PMS2, POU5F1, PPAP2B, PRPF6, PRPF4B, SALL4, SERPINE2, SLC3A2, Smad2/3, SMARCA4, SMARCC2, STAT3, SYVN1, TRPM3, WDR45 ANLN, BAZ1B, CHEK1, DBF4 (includes EG:10926), DDX11/DDX12P, E2F4, ERCC8, EXOSC8, FANCE, KIAA0101, KIF1B, KISS1, MARK1, MCM5, MED14, PANX3, PCNA, PKN2, PTPRN2, RAD 50, RAD51AP1, RBBP8, RINT1, RNA polymerase II, RRM1, RRM2, RUNX2, SHPRH, SND1, SPAG7, SVIL, TLN1, YWHAG, ZNF83, ZNF451                                                                                  | 15    | 14              | Antigen Presentation, Cellular Movement, Hematological System Development and Function              |
| 6          | ACHE, ADORA2B, AKAP2/PALM2-AKAP2, BIRC6, CASP1, CASP9 (includes EG:100140945), CCL18, CFB, CNTN1, DIABLO, DSC3 (includes EG:13507), FNDCA3, GCLM, IGHM, IGL@, LAMA3, LAMB3, LAMP3, MAFF, MOAP1, MS4A1, NFKB2, OASL, RPS13, RXRA, SEC16A, SERPINB1, SERPI N89, SFMBT2, SLAMF7, STAB1, TNF, TNIP3, TREM1, ZFP91                                                                                                                                                                                                                                                                                                                           | 14    | 13              | Embryonic Development, Organ Development, Organismal Development                                    |
| 7          | ADAMTS9, Akt, ASGR1, ATP6VOD1, BAG4, CDC37L1, DNAB1, FGF8, GDNF, HDAC8, Hsp70, Hsp90, IgG, IRS4 (includes EG:16370), Ink, KCNA5, KIF26B, KRT31, MDK, mir-29, MTOR, NDFIP1, NQO1, PACRG, PEA15, PIK3CB, PRR5, Rar, SIAH1, SMG5, SNCAIP, STIP1, STK3, STK4, TRIM16                                                                                                                                                                                                                                                                                                                                                                        | 12    | 12              | Cellular Compromise, Nervous System Development and Function, Tissue Development                    |
| 8          | ACTN4, AJAP1, AXIN1, CDH1, CDK17, CDK5R1, CPB2, CTNNA3, CTNNA3, CTNNA3, CUL3 (includes EG:26554), CYP24A1, DAXX, DBH, DIXDC1, FAM123B, GUCY2F, Hdac, HNF1A, HSD17B2, KLK6, LDL-cholesterol, LRP2, LRP1 (includes EG:16971), MAP3K4, MSX2, NDRG1, PAFAH2, PI3K p85, PKD1, PTPRF, SLC12A6, SLIT2, SMAD4, SPOP, THBD                                                                                                                                                                                                                                                                                                                       | 12    | 12              | DNA Replication, Recombination, and Repair, Cancer, Reproductive System Disease                     |
| 9          | PDX1 (includes EG:18609), SEZ6L                                                                                                                                                                                                                                                                                                                                                                                                                                                                                                                                                                                                         | 11    | 11              | Cell Death, Antigen Presentation, Cell Morphology                                                   |
| 10         | CAPRN2, mir-17                                                                                                                                                                                                                                                                                                                                                                                                                                                                                                                                                                                                                          | 9     | 10              | Cardiovascular System Development and Function, Embryonic Development, Organismal Development       |
| 11         | TUB, WDR35                                                                                                                                                                                                                                                                                                                                                                                                                                                                                                                                                                                                                              | 1     | 1               | Cell Morphology, Developmental Disorder, Digestive System Development and Function                  |
| 12         | CCR9, NADPH oxidase                                                                                                                                                                                                                                                                                                                                                                                                                                                                                                                                                                                                                     | 1     | 1               | Embryonic Development, Hair and Skin Development and Function, Organ Development                    |
| 13         | NGLY1, RAD23B                                                                                                                                                                                                                                                                                                                                                                                                                                                                                                                                                                                                                           | 1     | 1               | Cell Death, Nutritional Disease, Tissue Morphology                                                  |
| 14         | Nuclear factor 1, SLC25A5                                                                                                                                                                                                                                                                                                                                                                                                                                                                                                                                                                                                               | 1     | 1               | Cellular Function and Maintenance, Cellular Movement, Hematological System Development and Function |
| 15         | ABCC9, KCNJ11                                                                                                                                                                                                                                                                                                                                                                                                                                                                                                                                                                                                                           | 1     | 1               | Digestive System Development and Function, Protein Degradation, Protein Synthesis                   |
| 16         | NRK, ZNF217                                                                                                                                                                                                                                                                                                                                                                                                                                                                                                                                                                                                                             | 1     | 1               | Molecular Transport, Nucleic Acid Metabolism, Small Molecule Biochemistry                           |
| 17         | FOXL2, TCEB3B                                                                                                                                                                                                                                                                                                                                                                                                                                                                                                                                                                                                                           | 1     | 1               | Molecular Transport, Cardiovascular Disease, Endocrine System Development and Function              |
| 18         | GNPAT, PEX7 (includes EG:18634)                                                                                                                                                                                                                                                                                                                                                                                                                                                                                                                                                                                                         | 1     | 1               | Cellular Development, Reproductive System Disease, Cardiovascular System Development and Function   |
| 19         | NDUFS3, NUBPL                                                                                                                                                                                                                                                                                                                                                                                                                                                                                                                                                                                                                           | 1     | 1               | Cellular Development, Dermatological Diseases and Conditions, Developmental Disorder                |
| 20         | RHAG, RHCE/RHD, SLC4A1                                                                                                                                                                                                                                                                                                                                                                                                                                                                                                                                                                                                                  | 1     | 1               | Lipid Metabolism, Small Molecule Biochemistry, Connective Tissue Disorders                          |
| 21         | VPS11, VPS18, VPS16 (includes EG:296159)                                                                                                                                                                                                                                                                                                                                                                                                                                                                                                                                                                                                | 1     | 1               | Hereditary Disorder, Metabolic Disease, Cellular Assembly and Organization                          |
| 22         |                                                                                                                                                                                                                                                                                                                                                                                                                                                                                                                                                                                                                                         | 1     | 1               | Cellular Assembly and Organization, Hematological Disease, Cell-To-Cell Signaling and Interaction   |
| 23         |                                                                                                                                                                                                                                                                                                                                                                                                                                                                                                                                                                                                                                         | 1     | 1               | Cell Cycle, Cellular Assembly and Organization, Cellular Function and Maintenance                   |
| 24         |                                                                                                                                                                                                                                                                                                                                                                                                                                                                                                                                                                                                                                         | 1     | 1               |                                                                                                     |

**Supplementary Table 15: Estimated power to detect somatically mutated genes in a discovery screen of 12 tumors**

| <b>Actual mutation frequency of gene "G" in serous endometrial cancer</b> | <b>Power to detect one tumor with a mutation in gene "G" in a discovery screen of 12 tumors</b> | <b>Power to detect two tumors with a mutation in gene "G" in a discovery screen of 12 tumors</b> |
|---------------------------------------------------------------------------|-------------------------------------------------------------------------------------------------|--------------------------------------------------------------------------------------------------|
| 8%                                                                        | 63.20%                                                                                          | 24.90%                                                                                           |
| 10%                                                                       | 71.80%                                                                                          | 34.10%                                                                                           |
| 15%                                                                       | 85.80%                                                                                          | 55.70%                                                                                           |
| 20%                                                                       | 93.10%                                                                                          | 72.50%                                                                                           |
